# Supplementary material for: Facile oxidative cyclization to access C2-quaternary 2-hydroxy-indolin-3-ones: synthetic studies towards matemone
Source: Royal Society of Chemistry journal article supplement (doi:10.1039/c7nj02246h), 2017-01-01
Supplement: c7nj02246h1.pdf [file c7nj02246h1.pdf]

## **Facile oxidative cyclization to access C2-quaternary 2-hydroxy-indolin-3-ones: Synthetic studies towards matemone**

Sai-Shuai Wen,<sup>a, +</sup>Zhao-Fang Zhou,<sup>a, +</sup>Jun-An Xiao,<sup>b, +</sup> Jun Li,<sup>a</sup>HaoyueXiang,<sup>a</sup> and HuaYang<sup>a,\*</sup>

<sup>a</sup> College of Chemistry and Chemical Engineering, Central South University, Changsha, Hunan 410083, P. R. China.

<sup>b</sup> College of Chemistry and Materials Science, Guangxi Teachers Education University, Nanning 530001, Guangxi, P. R. China

E-mail: [hyangchem@csu.edu.cn](mailto:hyangchem@csu.edu.cn)

### **Contents**

|                                                                   |                |
|-------------------------------------------------------------------|----------------|
| <b>1. General Information</b> .....                               | <b>S2</b>      |
| <b>2. Experimental Procedures and characterization data</b> ..... | <b>S2-S12</b>  |
| <b>3. NMR Spectra of new compounds</b> .....                      | <b>S13-S30</b> |
| <b>4. X-ray crystallographic data of compound11</b> .....         | <b>S31</b>     |

## 1. General information

Unless otherwise noted, all the reagents were purchased from commercial suppliers and used without further purification.  $^1\text{H}$  NMR spectra were recorded at 400 MHz. The chemical shifts were recorded in ppm relative to tetramethylsilane and with the solvent resonance as the internal standard. Data were reported as follows: chemical shift, multiplicity (s = singlet, d = doublet, t = triplet, q = quartet, m = multiplet), coupling constants (Hz), integration.  $^{13}\text{C}$  NMR data were collected at 100 MHz with complete proton decoupling. Chemical shifts were reported in ppm from the tetramethylsilane with the solvent resonance as internal standard. Infrared spectra (IR) were measured by FT-IR apparatus. High resolution mass spectroscopy (HRMS) was recorded on TOF MS ES+ mass spectrometer and acetonitrile and dichloromethane were used to dissolve the sample. Column chromatography was carried out on aluminum oxide (200-300 mesh).

## 2. Experimental procedures and characterization data

### General Procedure for Synthesis of Diketone 2b, 2d and 2e:

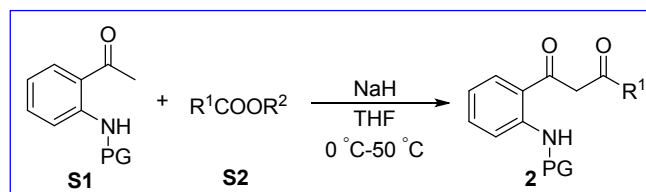

To a solution of 2-amino-acetophenone derivatives (10.0 mmol) in THF (40 mL) was added NaH (1.50 g, 60% dispersion in mineral oil) and the mixture was stirred at r.t. for 10 min. To the mixture was added ester (20.0 mmol) dropwise, and the reaction mixture was heated at 50°C for 4 hours. Then, the mixture was cooled to 0°C, quenched with water, acidified with 3NHCl, and extracted with ethyl acetate (3 × 20 mL). The combined organic layers were dried over anhydrous Na<sub>2</sub>SO<sub>4</sub>, concentrated *in vacuo*, and purified by silica gel column chromatography (ethyl acetate/petroleum ether = 19:1) to provide the desired diketone 2.

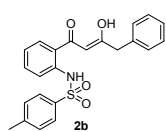

Diketone **2b**: Orange solid (3.39 g, 83% yield); m.p. 144-146°C; IR (KBr)  $\nu$  3063, 1573, 1494, 1163, 921  $\text{cm}^{-1}$ ;  $^1\text{H}$  NMR (CDCl<sub>3</sub>, 400 MHz, *enolform*)  $\delta$  (ppm) 15.44 (s, 1H), 10.78 (s, 1H), 7.68 (d,  $J = 8.4$  Hz, 2H), 7.64 (dd,  $J = 8.4, 0.8$  Hz, 1H), 7.47 (dd,  $J = 8.0, 1.2$  Hz, 1H), 7.27-7.42 (m, 6H), 7.17 (d,  $J = 8.0$  Hz, 2H), 7.02 (td,

$J = 8.0, 0.8$  Hz, 1H), 5.90 (s, 1H), 3.64 (s, 2H), 2.34 (s, 3H);  $^{13}\text{C}$  NMR ( $\text{CDCl}_3$ , 100 MHz)  $\delta$  (ppm) 188.2, 181.7, 139.0, 134.6, 131.6, 130.1, 129.2, 124.8, 124.7, 124.5, 124.1, 122.7, 122.5, 118.7, 118.5, 115.9, 92.5, 38.5, 16.8; HR-MS (TOF-ES+)  $m/z$ :  $[\text{M}+\text{H}]^+$  calcd for  $\text{C}_{23}\text{H}_{22}\text{NO}_4\text{S}$  408.1270, found 408.1290.

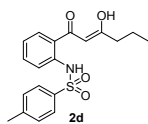

Diketone **2d**: Purple solid (3.48 g, 97% yield); m.p. 70-71°C; IR (KBr)  $\nu$  3063, 2962, 1603, 1576, 1153  $\text{cm}^{-1}$ ;  $^1\text{H}$  NMR ( $\text{CDCl}_3$ , 400 MHz, *enol form*)  $\delta$  (ppm) 15.46 (s, 1H), 10.75 (s, 1H), 7.65-7.68 (m, 3H), 7.57 (dd,  $J = 8.0, 1.2$  Hz, 1H), 7.42 (td,  $J = 8.4, 1.2$  Hz, 1H), 7.18 (d,  $J = 8.0$  Hz, 2H), 7.06 (td,  $J = 8.0, 1.2$  Hz, 1H), 5.92 (s, 1H), 2.28-2.37 (m, 7H), 1.64-1.71 (m, 4H), 0.91-1.01 (m, 5H);  $^{13}\text{C}$  NMR ( $\text{CDCl}_3$ , 100 MHz)  $\delta$  (ppm) 193.2, 188.84, 143.7, 139.2, 136.4, 133.7, 129.6, 129.3, 124.0, 123.4, 121.1, 97.0, 38.7, 21.5, 19.8, 13.7; HR-MS (TOF-ES+)  $m/z$ :  $[\text{M}+\text{Na}]^+$  calcd for  $\text{C}_{19}\text{H}_{21}\text{NO}_4\text{SNa}$  382.1089, found 382.1106.

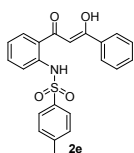

Diketone **2e**: Yellow solid (3.42 g, 87% yield); m.p. 164-165°C; IR (KBr)  $\nu$  3196, 1489, 1158, 909, 763  $\text{cm}^{-1}$ ;  $^1\text{H}$  NMR ( $\text{CDCl}_3$ , 400 MHz, *enol form*)  $\delta$  (ppm) 16.00 (s, 1H), 10.44 (s, 1H), 7.89 (dd,  $J = 8.4, 1.2$  Hz, 2H), 7.49-7.71 (m, 8H), 7.10-7.16 (m, 3H), 6.46 (s, 1H), 2.15 (s, 3H);  $^{13}\text{C}$  NMR ( $\text{CDCl}_3$ , 100 MHz)  $\delta$  (ppm) 193.4, 179.8, 143.8, 138.6, 136.0, 133.6, 133.5, 132.8, 129.6, 129.1, 128.9, 127.2, 126.9, 125.7, 124.1, 122.4, 94.6, 21.3; HR-MS (TOF-ES+)  $m/z$ :  $[\text{M}+\text{H}]^+$  calcd for  $\text{C}_{22}\text{H}_{20}\text{NO}_4\text{S}$  394.1113, found 394.1111.

### General Procedure of Oxidative Cyclization for the synthesis of 3a-3e:

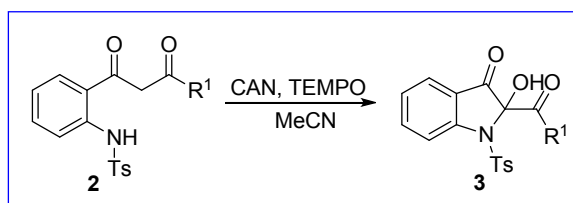

To a solution of 1,3-dicarbonyl substrate (0.5 mmol) in MeCN (5 mL) was added ceric ammonium nitrate (CAN, 548 mg, 1.0 mmol, 2.0 equiv.) and 2,2,6,6-tetramethyl-1-piperidinyloxy (TEMPO, 94 mg, 0.6 mmol, 1.2 equiv.). And the mixture was stirred at r.t. for the given time. After completion of the reaction monitored by TLC, the mixture was filtered and the filtrate was concentrated under reduced pressure. The crude mixture was purified by silica gel column chromatography (ethyl acetate/petroleum ether = 1:9-1:5) to provide indolin-3-one **3a-3e**.

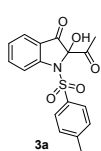

2-Acetyl-2-hydroxy-1-tosylindolin-3-one **3a**: Yellow solid (63% yield); m.p. 89-90°C; IR (KBr)  $\nu$  3587, 3473, 3089, 1748, 1602, 1354, 1153  $\text{cm}^{-1}$ ;  $^1\text{H}$  NMR ( $\text{CDCl}_3$ , 500

MHz)  $\delta$  (ppm) 8.00 (d,  $J = 8.0$  Hz, 2H), 7.67-7.76 (m, 3H), 7.33 (d,  $J = 8.0$  Hz, 2H), 7.20-7.23 (m, 1H), 5.78 (s, 1H), 2.43 (s, 3H), 2.36 (s, 3H);  $^{13}\text{C}$  NMR ( $\text{CDCl}_3$ , 100 MHz)  $\delta$  (ppm) 197.6, 191.6, 152.6, 145.2, 138.6, 135.7, 129.8, 128.1, 125.9, 124.2, 120.8, 114.2, 91.8, 23.2, 21.7; HR-MS (TOF-ES+)  $m/z$ :  $[\text{M}+\text{Na}]^+$  calcd for  $\text{C}_{17}\text{H}_{15}\text{NO}_5\text{SNa}$  368.0569, found 368.0567.

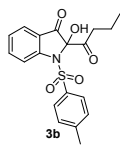

Indolin-3-one **3b**: Amber oil (57% yield); IR (KBr)  $\nu$  2967, 1743, 1601, 1359, 1164  $\text{cm}^{-1}$ ;  $^1\text{H}$  NMR ( $\text{CDCl}_3$ , 400 MHz)  $\delta$  (ppm) 7.98 (d,  $J = 8.4$  Hz, 2H), 7.64-7.73 (m, 3H), 7.30 (d,  $J = 8.4$  Hz, 2H), 7.19 (t,  $J = 7.6$  Hz, 1H), 5.86 (s, 1H), 2.90-2.98 (m, 1H),

2.40 (s, 3H), 2.19-2.27 (m, 1H), 1.69-1.76 (m, 2H), 0.91 (t,  $J = 7.6$  Hz, 3H);  $^{13}\text{C}$  NMR ( $\text{CDCl}_3$ , 100 MHz)  $\delta$  (ppm) 200.2, 191.9, 152.6, 145.2, 138.5, 135.5, 129.8, 128.3, 125.8, 124.1, 120.8, 114.1, 91.6, 37.7, 16.9, 13.4; HR-MS (TOF-ES+)  $m/z$ :  $[\text{M}+\text{Na}]^+$  calcd for  $\text{C}_{19}\text{H}_{19}\text{NO}_5\text{SNa}$  396.0882, found 396.0873.

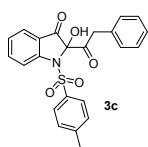

Indolin-3-one **3c**: Yellow solid (67% yield); m.p. 143-145°C; IR (KBr)  $\nu$  3390, 1748, 1599, 1464, 1342, 951  $\text{cm}^{-1}$ ;  $^1\text{H}$  NMR ( $\text{CDCl}_3$ , 400 MHz)  $\delta$  (ppm) 7.99 (d,  $J = 8.4$  Hz, 2H), 7.61-7.70 (m, 2H), 7.54 (d,  $J = 7.6$  Hz, 1H), 7.31 (d,  $J = 8.4$  Hz,

2H), 7.11-7.18 (m, 6H), 5.80 (s, 1H), 4.22 (d,  $J = 16.8$  Hz, 1H), 3.87 (d,  $J = 17.2$  Hz, 1H), 2.40 (s, 3H);  $^{13}\text{C}$  NMR ( $\text{CDCl}_3$ , 100 MHz)  $\delta$  (ppm) 198.7, 191.0, 152.2, 145.3, 138.2, 135.4, 130.8, 130.5, 129.8, 128.5, 128.2, 127.5, 125.8, 124.0, 120.7, 114.0, 91.6, 43.5, 21.7; HR-MS (TOF-ES+)  $m/z$ :  $[\text{M}+\text{Na}]^+$  calcd for  $\text{C}_{23}\text{H}_{19}\text{NO}_5\text{SNa}$  444.0882, found 444.0883.

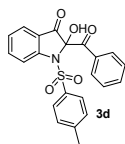

Indolin-3-one **3d**: White solid (70% yield); m.p. 157-159 °C; IR (KBr)  $\nu$  3352, 1735, 1688, 1599, 1493  $\text{cm}^{-1}$ ;  $^1\text{H}$  NMR ( $\text{CDCl}_3$ , 400 MHz)  $\delta$  (ppm) 7.97 (d,  $J = 8.4$  Hz, 2H), 7.82 (d,  $J = 7.6$  Hz, 2H), 7.78 (d,  $J = 8.0$  Hz, 1H), 7.70 (dd,  $J = 8.0, 1.2$  Hz, 2H),

7.56 (t,  $J = 7.2$  Hz, 1H), 7.36 (t,  $J = 7.6$  Hz, 2H), 7.29 (d,  $J = 8.4$  Hz, 2H), 7.21-7.26 (m, 1H), 6.47 (s, 1H), 2.39 (s, 3H);  $^{13}\text{C}$  NMR ( $\text{CDCl}_3$ , 100 MHz)  $\delta$  (ppm) 191.6, 190.9, 152.0, 145.2, 138.4, 135.6, 134.6, 131.6, 129.8, 129.1, 129.0, 128.3, 126.2, 124.4, 120.7, 114.5, 90.3, 21.6; HR-MS (TOF-ES+)  $m/z$ :  $[\text{M}+\text{Na}]^+$  calcd for  $\text{C}_{22}\text{H}_{17}\text{NO}_5\text{SNa}$  430.0725, found 430.0714.

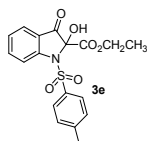

Indolin-3-one **3e**: White solid (99% yield); m.p. 141-142°C; IR (KBr)  $\nu$  3402, 1762, 1729, 1599, 1463, 1145  $\text{cm}^{-1}$ ;  $^1\text{H}$  NMR ( $\text{CDCl}_3$ , 400 MHz)  $\delta$  (ppm) 8.01 (d,  $J = 8.4$  Hz, 2H), 7.73 (d,  $J = 7.6$  Hz, 1H), 7.54-7.66 (m, 2H), 7.34 (d,  $J = 8.4$  Hz,

2H), 7.17 (td,  $J = 8.0, 1.2$  Hz, 1H), 5.34 (s, 1H), 4.30-4.50 (m, 2H), 2.43 (s, 3H), 1.28-1.36 (m, 3H);  $^{13}\text{C}$  NMR ( $\text{CDCl}_3$ , 100 MHz)  $\delta$  (ppm) 191.2, 167.2, 152.3, 145.1, 138.3, 136.0, 129.9, 128.0,

125.8, 123.8, 120.1, 113.7, 87.2, 64.5, 21.7, 13.9; HR-MS (TOF-ES+)  $m/z$ :  $[M+Na]^+$  calcd for  $C_{18}H_{17}NO_6SNa$  398.0674, found 398.0658.

**Synthesis for the Core Structure of Metamone:**

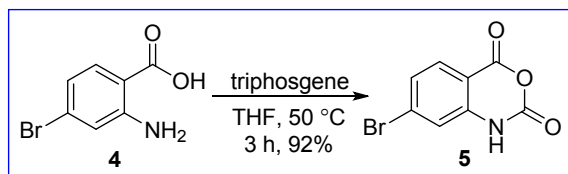

4-Bromoisatoic anhydride **5** was prepared as the reported procedure<sup>1</sup>: To a solution of 4-bromoanthranilic acid (**4**, 2.16 g, 10.0 mmol) in 50 mL of THF was added triphosgene (1.00 g, 3.4 mmol). The mixture was heated at 50°C for 3 hours. Then the reaction mixture was allowed to cool to room temperature. The solution was concentrated *in vacuo* and *n*-hexane was added. The precipitate was filtered, washed by *n*-hexane and dried to give the crude product as a tan powder (2.23 g, 92% yield), which was used without further purification.

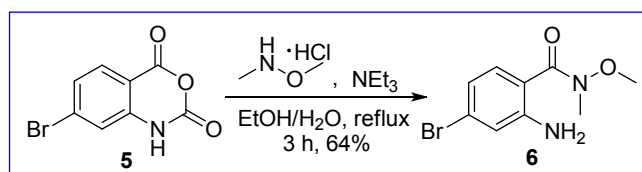

2-Amino-4-bromo-*N*-methoxy-*N*-methylbenzamide **6** was prepared as the reported procedure<sup>2</sup>: To a solution of *N,O*-dimethylhydroxylamine hydrochloride (0.91 g, 9.3 mmol) in 12 mL of 90% aqueous ethanol was added triethylamine (0.94 g, 9.3 mmol). After 10 min of stirring at room temperature, isatoic anhydride (1.50 g, 6.2 mmol) was added in portions. Then the mixture was refluxed for 2 hours and poured into 20 mL of mixture of ice and saturated sodium bicarbonate. And ethanol was removed *in vacuo*, and the remains were extracted with ethyl acetate ( $3 \times 20$  mL), and the organic layers were combined, washed with water (20 mL) and brine (20 mL), dried over  $Na_2SO_4$ , and concentrated *in vacuo* to give crude product as an amber oil (1.03 g, 64% yield). The crude product was also used without further purification.

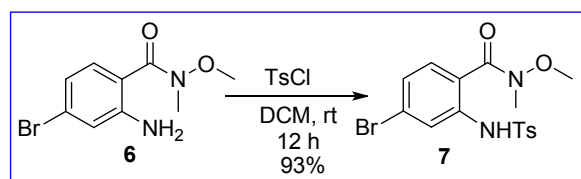

A solution of **6** (0.78g, 3.0 mmol), TsCl (1.72 g, 9.0 mmol, 3.0 equiv.) and pyridine (145  $\mu$ L,

1.8 mmol, 0.6 equiv.) in DCM (40 mL) was stirred overnight. Then, the mixture was washed with saturated copper sulfate solution (3 × 40 mL), and brine (50 mL). The organic layer was dried over Na<sub>2</sub>SO<sub>4</sub>, concentrated *in vacuo*, and the residue was purified *via* silica gel column chromatography (ethyl acetate/petroleum ether = 1:19) to provide tosyl-protected product **7a** as colorless oil (1.15 g, 93% yield). IR (KBr)  $\nu$ 3200, 1617, 1584, 1488, 1163, 668 cm<sup>-1</sup>; <sup>1</sup>H NMR (CDCl<sub>3</sub>, 400 MHz)  $\delta$  (ppm) 9.10 (*br s*, 1H), 7.85 (d, *J* = 1.6 Hz, 1H), 7.72 (d, *J* = 8.0 Hz, 2H), 7.39 (d, *J* = 8.4 Hz, 1H), 7.25 (d, *J* = 10.4 Hz, 2H), 7.20 (dd, *J* = 8.4, 1.6 Hz, 1H), 3.22 (s, 3H), 3.17 (s, 3H), 2.37 (s, 3H); <sup>13</sup>C NMR (CDCl<sub>3</sub>, 100 MHz)  $\delta$  (ppm) 167.2, 144.0, 138.3, 136.5, 130.5, 129.7, 127.3, 126.7, 125.9, 125.2, 121.2, 61.0, 33.4, 21.5; HR-MS (TOF-ES+) *m/z*: [M+Na]<sup>+</sup> calcd for C<sub>16</sub>H<sub>17</sub>N<sub>2</sub>O<sub>4</sub>SBrNa 434.9990, found 434.9990.

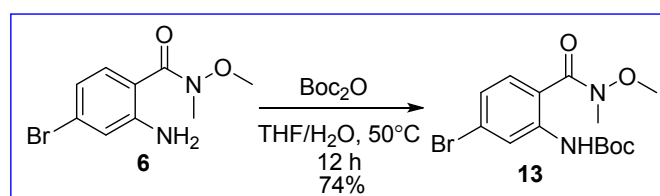

A solution of crude product **6** (0.78g, 3.0 mmol), Boc<sub>2</sub>O (1.96 g, 9.0 mmol, 3.0 equiv.) and NaOH (0.24 g, 6.0 mmol, 2.0 equiv.) in THF/H<sub>2</sub>O (1:1, 6 mL) was stirred at 60 °C overnight. After the completion, the mixture was acidified by HCl (3N) and washed with ethyl acetate (3 × 10 mL). The collected organic layer was washed with brine (10 mL), dried over Na<sub>2</sub>SO<sub>4</sub>, and concentrated *in vacuo*. The residue was purified *via* silica gel column chromatography (EtOAc/petroleum ether = 1:9) to provide Boc-protected product **13** as yellowish oil (0.80 g, 74% yield). IR (KBr)  $\nu$ 3354, 1734, 1627, 1585, 1569, 1505, 1152 cm<sup>-1</sup>; <sup>1</sup>H NMR (CDCl<sub>3</sub>, 400 MHz)  $\delta$  (ppm) 8.62 (s, 1H), 8.49 (s, 1H), 7.39 (d, *J* = 8.4 Hz, 1H), 7.13 (dd, *J* = 8.4, 2.0 Hz, 1H), 3.55 (s, 3H), 3.37 (s, 3H), 1.51 (s, 9H); <sup>13</sup>C NMR (CDCl<sub>3</sub>, 100 MHz)  $\delta$  (ppm) 168.2, 152.5, 139.7, 130.1, 126.0, 124.4, 122.8, 118.7, 81.0, 61.5, 34.0, 28.3; HR-MS (TOF-ES+) *m/z*: [M+Na]<sup>+</sup> calcd for C<sub>14</sub>H<sub>19</sub>N<sub>2</sub>O<sub>4</sub>BrNa 381.0426, found 381.0442.

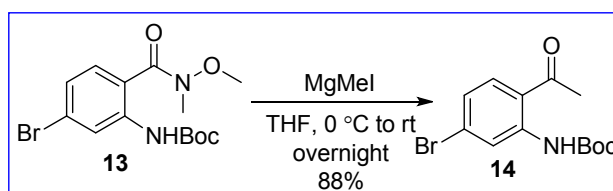

To a solution of **13** (2.4 mmol) in THF (30 mL) was added 2.4 mL of 3M methylmagnesium iodide (in diethyl ether) by syringe at 0°C. After the addition, the mixture was

allowed to warm to room temperature and be stirred overnight. When the reaction was completed as monitored by TLC, the mixture was quenched with saturated ammonium chloride solution (30 mL), extracted with ethyl acetate (3 × 30 mL), and the organic layers were washed with brine (50 mL), dried over Na<sub>2</sub>SO<sub>4</sub>, and concentrated *in vacuo*. And the residue was purified by silica gel column chromatography (EtOAc/petroleum ether = 1:9-1:3) to provide 4'-Bromo-2'-(*N*-*tert*-butyloxycarbonyl-aminoacetophenone(**14**) as colorless oil (0.66 g, 88% yield); IR (KBr)  $\nu$  3448, 2981, 1664, 1246, 1158, 743cm<sup>-1</sup>; <sup>1</sup>H NMR (CDCl<sub>3</sub>, 400 MHz)  $\delta$  (ppm) 11.00 (s, 1H), 8.74 (d, *J* = 2.0 Hz, 1H), 7.69 (d, *J* = 8.8 Hz, 1H), 7.15 (dd, *J* = 8.4, 2.0 Hz, 1H), 2.61 (s, 3H), 1.53 (s, 9H); <sup>13</sup>C NMR (CDCl<sub>3</sub>, 100 MHz)  $\delta$  (ppm) 201.5, 152.8, 142.8, 132.7, 130.1, 124.1, 122.0, 119.8, 81.0, 28.5, 28.2.

**Experimental Procedure of Acylation:**

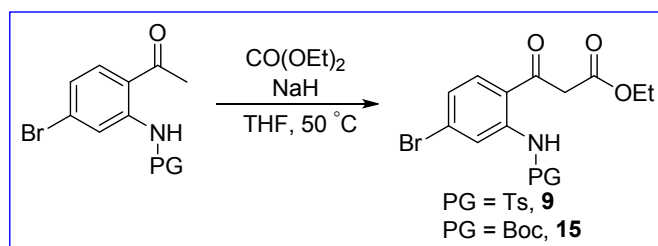

To a solution of protected 2'-amino-4'-bromoacetophenone (2.0mmol) in THF (10 mL) was added NaH (0.40 g, 60% dispersion in mineral oil) and the mixture was stirred at r.t. for 10 min. To the mixture was added diethyl oxalate (4.0 mmol) dropwise, and the reaction mixture was heated at 50°C for 4 hours. After completion, the mixture was cooled to 0°C, quenched with water, acidified with 3NHCl, and extracted with ethyl acetate (3 × 20 mL). The combined organic layers were dried over anhydrous Na<sub>2</sub>SO<sub>4</sub>, concentrated *in vacuo*, and purified by silica gel column chromatography (ethyl acetate/petroleum ether = 1:19) to provide the desired ketoester.

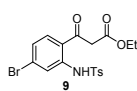 Ketoester **9**:Crimson oil (0.62g, 70% yield);IR (KBr)  $\nu$ 2982, 1732, 1645, 1595, 1159 cm<sup>-1</sup>; <sup>1</sup>H NMR (CDCl<sub>3</sub>, 400 MHz)  $\delta$  (ppm) 11.28 (s, 1H), 7.91 (d, *J* = 1.6 Hz, 1H), 7.78 (d, *J* = 8.4 Hz, 2H), 7.56 (d, *J* = 8.8 Hz, 1H), 7.28 (d, *J* = 8.0 Hz, 2H), 7.18 (dd, *J* = 8.8, 2.0 Hz, 1H), 4.20 (q, *J* = 7.2 Hz, 2H), 3.90 (s, 2H), 2.39 (s, 3H), 1.25 (t, *J* = 7.2 Hz, 3H); <sup>13</sup>C NMR (CDCl<sub>3</sub>, 100 MHz)  $\delta$  (ppm) 195.8, 166.6, 144.5, 141.7, 136.1, 132.6, 130.8, 129.9, 127.4, 125.7, 121.6, 119.6, 61.9, 47.1, 21.6, 14.0; HR-MS (TOF-ES+) *m/z*: [M+Na]<sup>+</sup>calcd for C<sub>18</sub>H<sub>18</sub>NO<sub>5</sub>SBrNa 461.9987, found 462.0009.

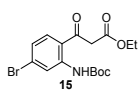

Ketoester **15**: White solid (0.54 g, 70% yield); m.p.: 69-70°C; IR (KBr)  $\nu$  2984, 1734, 1656, 1571, 1511, 1149  $\text{cm}^{-1}$ ;  $^1\text{H}$  NMR ( $\text{CDCl}_3$ , 400 MHz)  $\delta$  (ppm) 10.81 (s, 1H), 8.79 (d,  $J = 1.6$  Hz, 1H), 7.61 (d,  $J = 8.8$  Hz, 1H), 7.17 (dd,  $J = 8.8, 1.6$  Hz, 1H), 4.23 (q,  $J = 7.2$  Hz, 2H), 3.98 (s, 2H), 1.52 (s, 9H), 1.28 (t,  $J = 7.2$  Hz, 3H);  $^{13}\text{C}$  NMR ( $\text{CDCl}_3$ , 100 MHz)  $\delta$  (ppm) 195.6, 167.1, 152.7, 143.4, 132.3, 131.1, 124.3, 122.2, 118.8, 81.3, 61.8, 47.8, 28.2, 14.1; HR-MS (TOF-ES+) m/z:  $[\text{M}+\text{Na}]^+$  calcd for  $\text{C}_{16}\text{H}_{20}\text{NO}_5\text{BrNa}$  408.0423, found 408.0419.

### Experimental Procedure for Oxidative Cyclization:

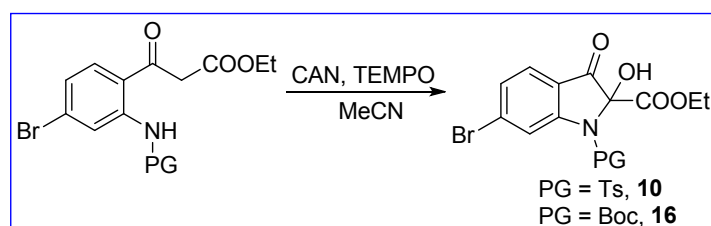

To a solution of ketoester (0.5 mmol) in MeCN (5 mL) was added ceric ammonium nitrate (548 mg, 1.0 mmol) and 2,2,6,6-tetramethylpiperidinoxy (94 mg, 0.6 mmol). The mixture was stirred at r.t. for the given time. Then, the solvent was removed *in vacuo* and the residue was purified *via* silica gel column chromatography (ethyl acetate/petroleum ether = 1:19-1:9) to provide the corresponding indolin-3-one.

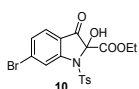

Indolin-3-one **10**: Pink solid (210 mg, 92% yield); m.p.: 140-141°C; IR (KBr)  $\nu$  3425, 1757, 1598, 1364, 1162  $\text{cm}^{-1}$ ;  $^1\text{H}$  NMR ( $\text{CDCl}_3$ , 400 MHz)  $\delta$  (ppm) 7.97 (d,  $J = 8.4$  Hz, 2H), 7.77 (d,  $J = 1.6$  Hz, 1H), 7.54 (d,  $J = 8.0$  Hz, 1H), 7.35 (d,  $J = 8.0$  Hz, 2H), 7.29 (dd,  $J = 8.4, 1.6$  Hz, 1H), 5.34 (s, 1H), 4.27-4.48 (m, 2H), 2.43 (s, 3H), 1.30 (t,  $J = 7.2$  Hz, 3H);  $^{13}\text{C}$  NMR ( $\text{CDCl}_3$ , 100 MHz)  $\delta$  (ppm) 190.1, 166.8, 152.7, 145.4, 135.7, 134.0, 130.0, 127.9, 127.5, 126.6, 119.0, 117.2, 87.6, 64.6, 21.7, 13.9; HR-MS (TOF-ES+) m/z:  $[\text{M}+\text{Na}]^+$  calcd for  $\text{C}_{18}\text{H}_{16}\text{NO}_6\text{SBrNa}$  475.9779, found 475.9756.

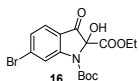

Indolin-3-one **16**: Colorless oil (194 mg, 97% yield); IR (KBr)  $\nu$  3450, 1726, 1633, 1429, 1263, 570  $\text{cm}^{-1}$ ;  $^1\text{H}$  NMR ( $\text{DMSO}-d_6$ , 400 MHz)  $\delta$  (ppm) 8.28 (s, 1H), 7.93 (s, 1H), 7.69 (d,  $J = 8.0$  Hz, 1H), 7.48 (dd,  $J = 8.4, 1.6$  Hz, 1H), 4.09-4.24 (m, 2H), 1.49 (s, 9H), 1.13 (t,  $J = 7.2$  Hz, 3H);  $^{13}\text{C}$  NMR ( $\text{DMSO}-d_6$ , 100 MHz)  $\delta$  (ppm) 192.4, 165.7, 149.7, 133.2, 127.5, 126.9, 119.4, 118.9, 87.7, 84.1, 62.6, 28.0, 14.4; HR-MS (TOF-ES+) m/z:  $[\text{M}+\text{Na}]^+$  calcd for  $\text{C}_{16}\text{H}_{18}\text{NO}_6\text{BrNa}$  422.0215, found 422.0255.

### Experimental Procedure of Methylation<sup>3</sup>:



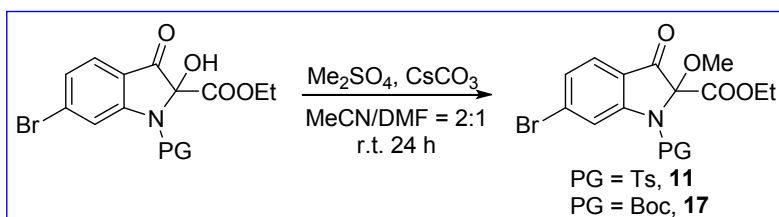

To a solution of protected indolin-3-one (0.5 mmol) in CH<sub>3</sub>CN/DMF (2:1, 3.6 mL) was added Cs<sub>2</sub>CO<sub>3</sub> (570 mg, 1.75 mmol) and Me<sub>2</sub>SO<sub>4</sub> (48 μL, 1.75 mmol). The reaction was stirred at room temperature for 24 hours. After completion, the solvent was removed *in vacuo* and the residue was purified by silica gel column chromatography (ethyl acetate/petroleum ether = -1:9-1:5) to provide the desired product.

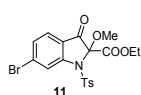

**Indolin-3-one 11:** White solid (218 mg, 93% yield); m.p.: 161-162°C; IR (KBr)  $\nu$  2969, 1725, 1596, 1425, 1098, 948 cm<sup>-1</sup>; <sup>1</sup>H NMR (CDCl<sub>3</sub>, 400 MHz)  $\delta$  (ppm) 8.06 (d, *J* = 1.2 Hz, 1H), 7.99 (d, *J* = 8.4 Hz, 2H), 7.54 (d, *J* = 8.0 Hz, 1H), 7.39 (d, *J* = 8.4 Hz, 2H), 7.32 (dd, *J* = 8.0, 1.2 Hz, 1H), 4.22-4.38 (m, 2H), 2.90 (s, 3H), 2.45 (s, 3H), 1.27 (t, *J* = 7.2 Hz, 3H); <sup>13</sup>C NMR (CDCl<sub>3</sub>, 100 MHz)  $\delta$  (ppm) 190.0, 163.6, 153.7, 145.5, 136.1, 134.3, 130.0, 127.6, 127.3, 126.1, 119.6, 117.2, 93.3, 63.2, 52.8, 21.7, 13.9; HR-MS (TOF-ES+) *m/z*: [M+Na]<sup>+</sup> calcd for C<sub>19</sub>H<sub>18</sub>NO<sub>6</sub>SBrNa 489.9936, found 489.9921.

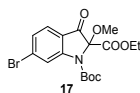

**Indolin-3-one 17:** Colorless oil (163 mg, 79% yield); IR (KBr)  $\nu$  2981, 1777, 1725, 1600, 1428, 1354, 1140 cm<sup>-1</sup>; <sup>1</sup>H NMR (CDCl<sub>3</sub>, 400 MHz)  $\delta$  (ppm) 8.49 (s, 1H), 7.57 (d, *J* = 8.4 Hz, 1H), 7.34 (d, *J* = 8.0 Hz, 1H), 4.18-4.30 (m, 2H), 3.30 (s, 3H), 1.55 (s, 9H), 1.24 (t, *J* = 7.2 Hz, 3H); <sup>13</sup>C NMR (CDCl<sub>3</sub>, 100 MHz)  $\delta$  (ppm) 191.3, 163.8, 154.3, 149.8, 134.1, 127.3, 125.4, 119.94, 119.88, 91.4, 84.3, 62.8, 52.2, 28.0, 14.0; HR-MS (TOF-ES+) *m/z*: [M+Na]<sup>+</sup> calcd for C<sub>17</sub>H<sub>20</sub>NO<sub>6</sub>BrNa 436.0372, found 436.0373.

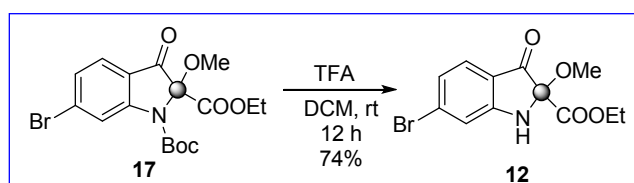

A solution of Boc-protected indolin-3-one **17** (124 mg, 0.3 mmol) in DCM (6 mL) was added trifluoroacetic acid (225 μL, 3.0 mmol). The reaction mixture was stirred at room temperature overnight. After completion, the mixture was allowed to cool to 0°C, acidified by aqueous ammonia, and washed with ethyl acetate (3 × 20 mL). The combined organic layers were washed

with brine (30 mL), dried over anhydrous  $\text{Na}_2\text{SO}_4$ , concentrated *in vacuo*, and purified *via* silica gel column chromatography (ethyl acetate/petroleum ether = 1:9-1:5) to provide deprotected indolin-3-one **12** as yellow oil (70 mg, 74% yield). IR (KBr)  $\nu$  3335, 1751, 1716, 1607, 1451, 914  $\text{cm}^{-1}$ ;  $^1\text{H}$  NMR ( $\text{CDCl}_3$ , 400 MHz)  $\delta$  (ppm) 7.45 (d,  $J = 8.4$  Hz, 1H), 7.18 (s, 1H), 7.07 (dd,  $J = 8.0, 1.2$  Hz, 1H), 5.41 (s, 1H), 4.25-4.35 (m, 2H), 3.35 (s, 3H), 1.30 (t,  $J = 7.2$  Hz, 3H);  $^{13}\text{C}$  NMR ( $\text{CDCl}_3$ , 100 MHz)  $\delta$  (ppm) 193.0, 166.0, 160.9, 134.0, 126.2, 124.6, 118.4, 116.4, 91.7, 63.4, 52.1, 14.0; HR-MS (TOF-ES+)  $m/z$ :  $[\text{M}+\text{Na}]^+$  calcd for  $\text{C}_{12}\text{H}_{12}\text{NO}_4\text{BrNa}$  335.9847, found 335.9846.

### Efforts to the Reduction of Ester to Matemone

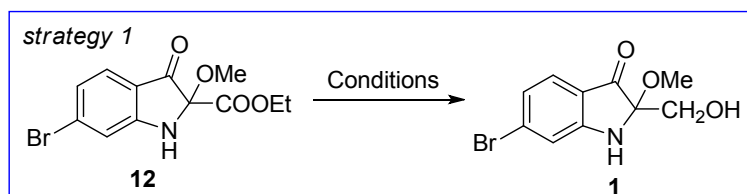

| Entry | Conditions                                                             | Result  |
|-------|------------------------------------------------------------------------|---------|
| 1     | 1.5 eq. $\text{NaBH}_4$                                                | NR      |
| 2     | 1.5 eq. $\text{LiAlH}_4$                                               | ND      |
| 3     | 3.0 eq. $\text{LiAlH}_4$                                               | ND      |
| 4     | 3.0 eq. $\text{LiAlH}_4$ reflux                                        | ND      |
| 5     | 10.0 eq. $\text{LiAlH}_4$                                              | Complex |
| 6     | 8.0 eq. $\text{LiAlH}_4$                                               | Complex |
| 7     | 1.5 eq. $\text{NaBH}_4$ / 3.0 eq. $\text{CaCl}_2$                      | Complex |
| 8     | 1.5 eq. $\text{NaBH}_4$ / 3.0 eq. $\text{CaCl}_2$ , 0 $^\circ\text{C}$ | ND      |
| 9     | 1.5 eq. $\text{BH}_3$ -THF                                             | ND      |
| 10    | 5.0 eq. $\text{BH}_3$ -THF                                             | ND      |

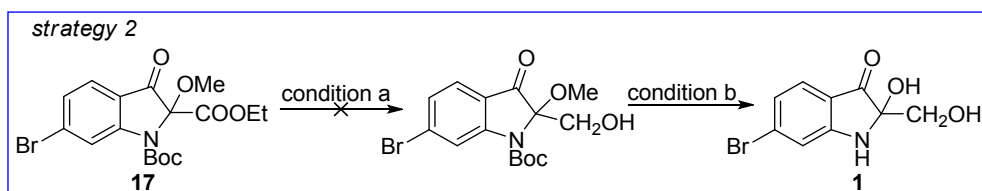

| Entry | Condition a                | Condition b | result  |
|-------|----------------------------|-------------|---------|
| 1     | 1.5 eq. $\text{NaBH}_4$    | TFA         | ND      |
| 2     | 1.5 eq. $\text{LiAlH}_4$   | --          | Complex |
| 3     | 1.5 eq. $\text{BH}_3$ -THF | --          | NR      |
| 4     | 5.0 eq. $\text{BH}_3$ -THF | --          | trace   |

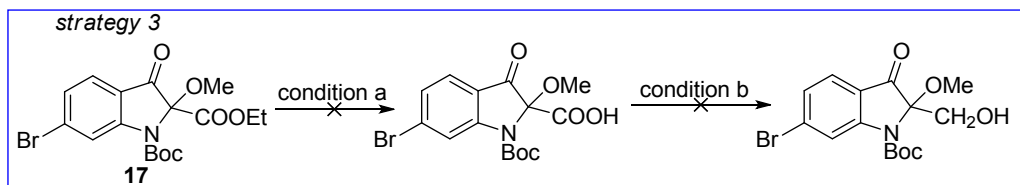

| Entry | Condition a | Condition b                         | result  |
|-------|-------------|-------------------------------------|---------|
| 1     | NaOH        | 1.5 eq. BH <sub>3</sub> -THF        | NR      |
| 2     | NaOH        | 1.5 eq. BH <sub>3</sub> -THF reflux | NR      |
| 3     | NaOH        | 5.0 eq. BH <sub>3</sub> -THF        | Trace   |
| 4     | NaOH        | NMM/ IBCF/ NaBH <sub>4</sub>        | complex |

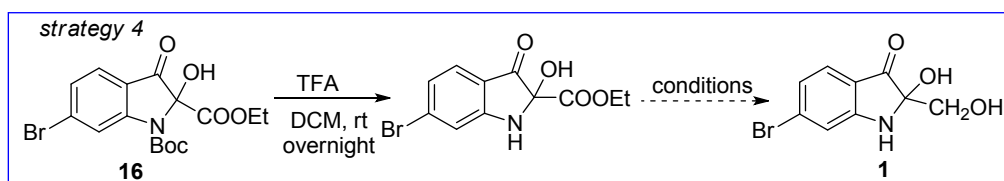

| Entry | Conditions                                             | Result  |
|-------|--------------------------------------------------------|---------|
| 1     | 5.0 eq. NaBH <sub>4</sub>                              | Complex |
| 2     | 5.0 eq. BH <sub>3</sub> -THF                           | Complex |
| 3     | 12.0 eq. NaBH <sub>4</sub> , 7.0 eq. CaCl <sub>2</sub> | Complex |
| 4     | 6.0 eq. NaBH <sub>4</sub> , 3.5 eq. CaCl <sub>2</sub>  | Complex |
| 5     | 10.0eq. LiAlH <sub>4</sub>                             | Complex |
| 6     | 5.0eq. LiAlH <sub>4</sub>                              | Complex |

### Removal of Tosyl Group:

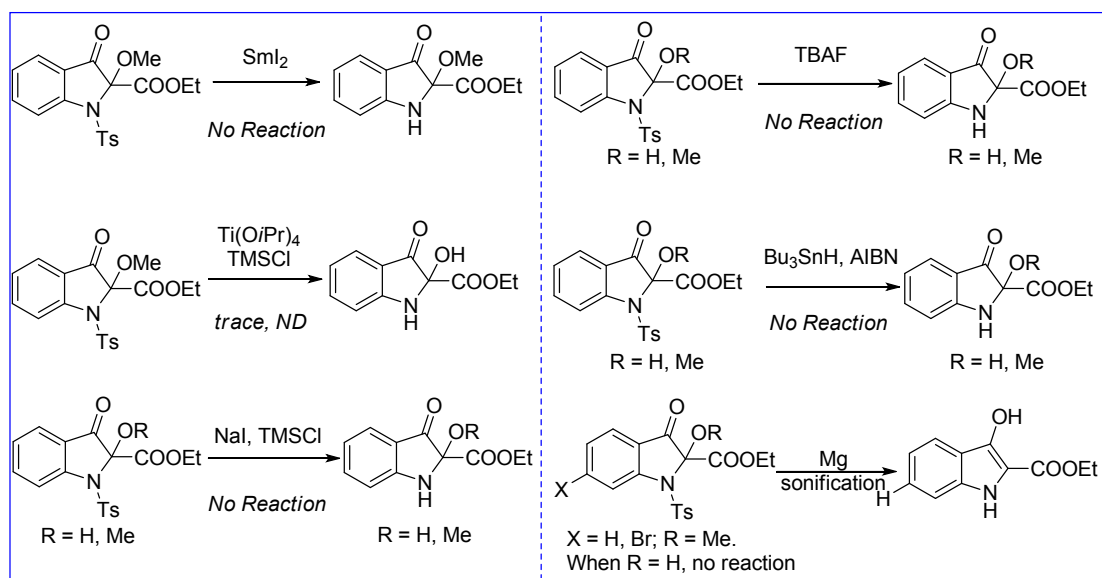

- [1] Darras, F. H.; Kling, B.; Heilmann, J.; Decker, M. *ACS Med. Chem. Lett.* **2012**, *3*, 914-919.
- [2] Frye, S. V.; Johnson, M. C.; Valvano, N. L. *J. Org. Chem.* **1991**, *56*, 3750-3752.
- [3] Ren, Q.; Huang, J.; Wang, L.; Li, W.; Liu, H.; Jiang, X.; Wang, J. *ACS Catalysis* **2012**, *12*, 2622-2625.

### 3. NMR Spectra of New Compounds

SV-231-M

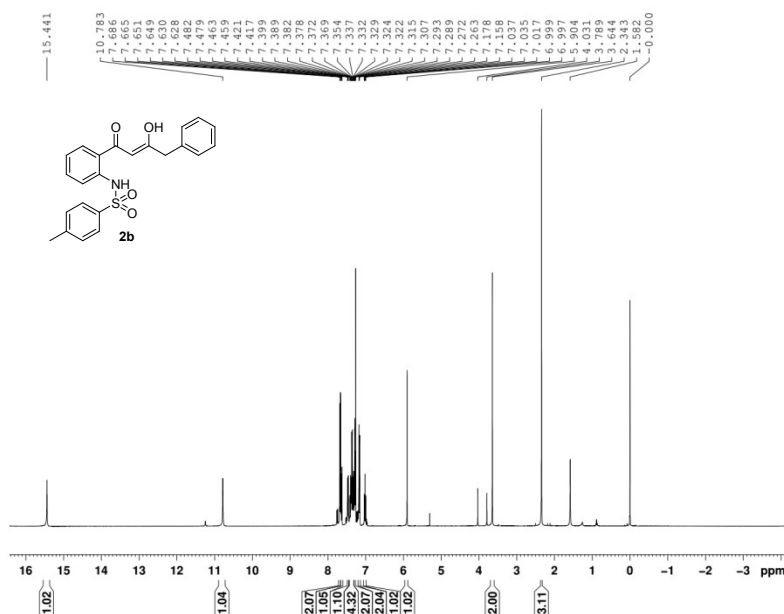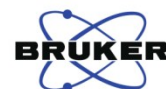

Current Data Parameters  
 NAME 01-23-2015  
 EXPNO 1  
 PROCNO 1

F2 - Acquisition Parameters  
 Date\_ 20150123  
 Time 10:27  
 INSTRUM spect  
 PROBHD 5 mm PABBO BB-  
 PULPROG zg30  
 TD 65536  
 SOLVENT CDCl3  
 NS 128  
 DS 2  
 SWH 8223.685 Hz  
 FIDRES 0.125483 Hz  
 AQ 3.984597 sec  
 RG 198.33  
 DW 60.800 usec  
 DE 6.50 usec  
 TE 0 K  
 D1 1.00000000 sec

----- CHANNEL f1 -----  
 NUC1 1H  
 P1 14.00 usec  
 PLW1 9.72999954 W  
 SFO1 400.1324710 MHz

F2 - Processing parameters  
 SI 65536  
 SF 400.1300088 MHz  
 WDW EM  
 SSB 0  
 LB 0.30 Hz  
 GB 0  
 PC 1.00

SV-231-M

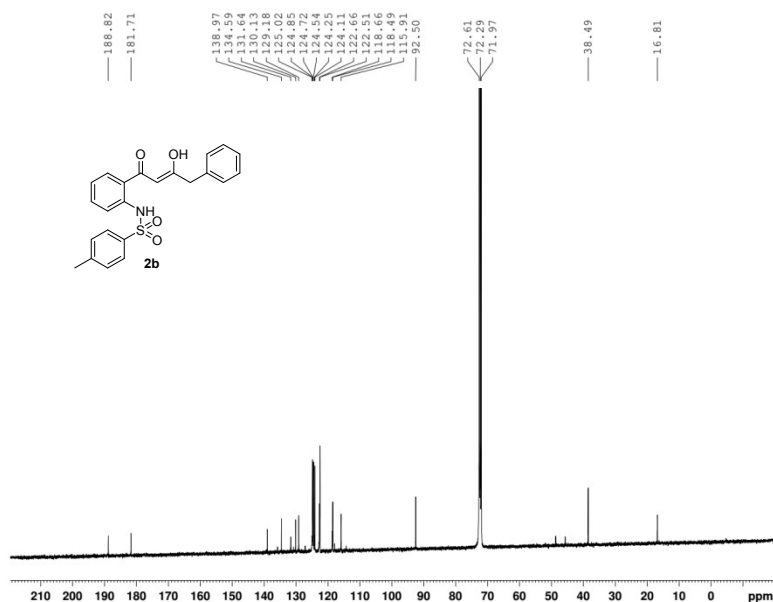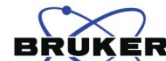

Current Data Parameters  
 NAME 01-23-2015  
 EXPNO 7  
 PROCNO 1

F2 - Acquisition Parameters  
 Date\_ 20150128  
 Time 5:22  
 INSTRUM spect  
 PROBHD 5 mm PABBO BB-  
 PULPROG zgpg30  
 TD 65536  
 SOLVENT DMSO  
 NS 12008  
 DS 4  
 SWH 24038.461 Hz  
 FIDRES 0.366798 Hz  
 AQ 1.3631988 sec  
 RG 168.03  
 DW 20.800 usec  
 DE 6.50 usec  
 TE 299.9 K  
 D1 2.00000000 sec  
 D11 0.03000000 sec

----- CHANNEL f1 -----  
 NUC1 13C  
 P1 9.00 usec  
 PLW1 50.09999847 W  
 SFO1 100.6228293 MHz

----- CHANNEL f2 -----  
 CPDPRG2 waltz16  
 NUC2 1H  
 PCPD2 90.00 usec  
 PLW2 9.3699989 W  
 PLW12 0.22673000 W  
 PLW13 0.18365000 W  
 SFO2 400.1316005 MHz

F2 - Processing parameters  
 SI 32768  
 SF 100.6127690 MHz  
 WDW EM  
 SSB 0  
 LB 1.00 Hz  
 GB 0  
 PC 1.40

SV-252

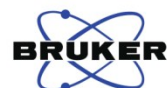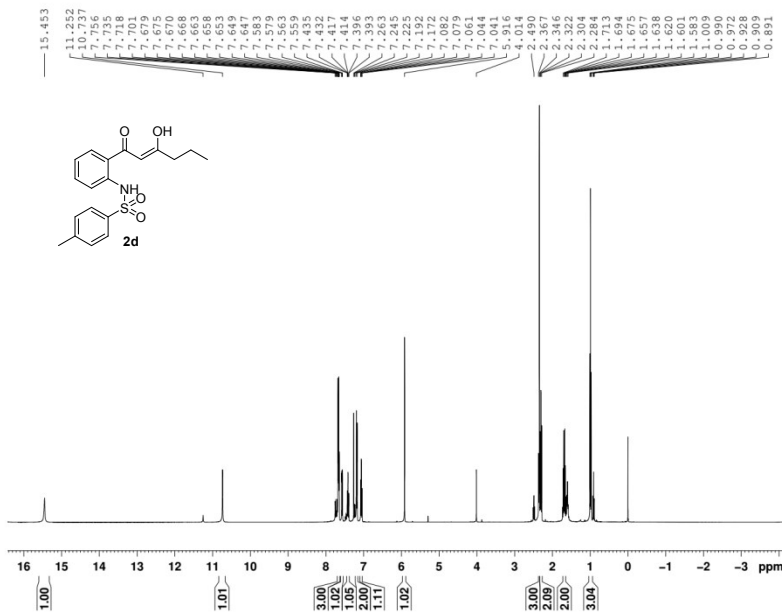

Current Data Parameters  
 NAME 09-07-2015  
 EXPNO 6  
 PROCNO 1

F2 - Acquisition Parameters  
 Date\_ 20150907  
 Time 10.47  
 INSTRUM spect  
 PROBHD 5 mm PABBO BB-  
 PULPROG zg30  
 ID 65536  
 SOLVENT CDCl3  
 NS 64  
 DS 2  
 SWH 8223.685 Hz  
 FIDRES 0.125483 Hz  
 AQ 3.9845387 sec  
 RG 152.51  
 DW 60.800 usec  
 DE 6.50 usec  
 TE 298.0 K  
 D1 1.00000000 sec

----- CHANNEL f1 -----  
 NUC1 1H  
 P1 14.00 usec  
 PLW1 9.7299954 W  
 SF01 400.1324710 MHz

F2 - Processing parameters  
 SI 65536  
 SF 400.1300091 MHz  
 WDW EM  
 SSB 0  
 LB 0.30 Hz  
 GB 0  
 PC 1.00

SV-252

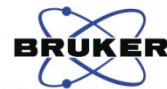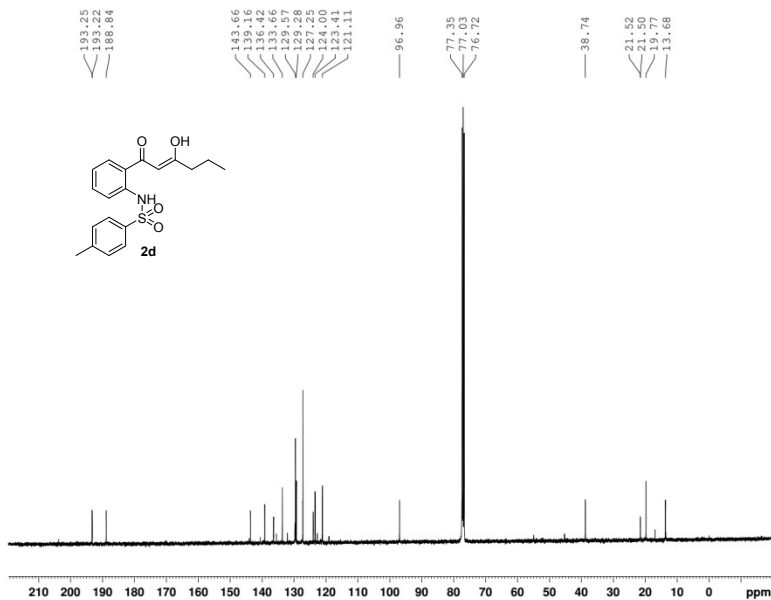

Current Data Parameters  
 NAME 09-07-2015  
 EXPNO 17  
 PROCNO 1

F2 - Acquisition Parameters  
 Date\_ 20150908  
 Time 19.04  
 INSTRUM spect  
 PROBHD 5 mm PABBO BB-  
 PULPROG zg30  
 ID 65536  
 SOLVENT CDCl3  
 NS 2000  
 DS 4  
 SWH 24038.461 Hz  
 FIDRES 0.366798 Hz  
 AQ 1.3631988 sec  
 RG 168.03  
 DW 20.800 usec  
 DE 6.50 usec  
 TE 299.9 K  
 D1 2.00000000 sec  
 D11 0.03000000 sec

----- CHANNEL f1 -----  
 NUC1 13C  
 P1 9.00 usec  
 PLW1 50.09999847 W  
 SF01 100.6228293 MHz

----- CHANNEL f2 -----  
 CPDPRG2 waltz16  
 NUC2 1H  
 PCPD2 90.00 usec  
 PLW2 9.36999989 W  
 PLW12 0.22673000 W  
 PLW13 0.18365000 W  
 SFO2 400.1316005 MHz

F2 - Processing parameters  
 SI 32768  
 SF 100.6127690 MHz  
 WDW EM  
 SSB 0  
 LB 1.00 Hz  
 GB 0  
 PC 1.40

SV-275-M

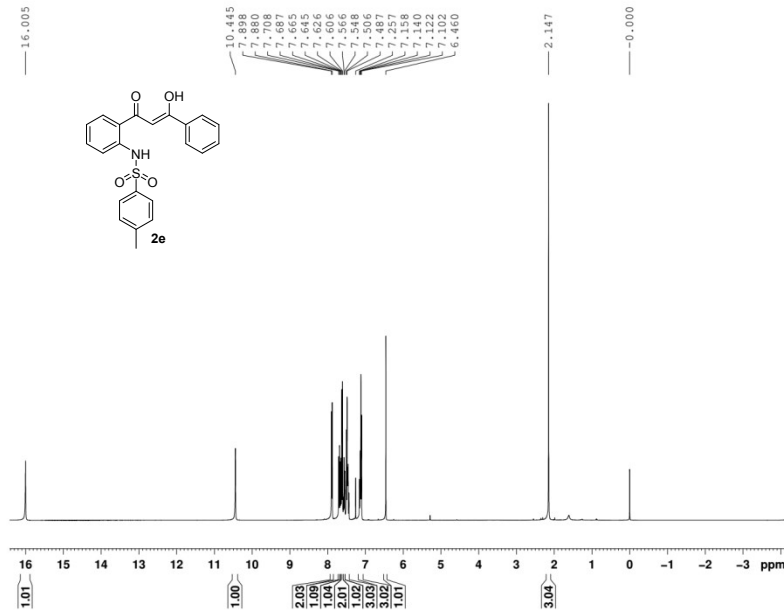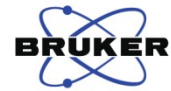

Current Data Parameters  
 NAME 09-29-2015  
 EXPNO 1  
 PROCNO 1

F2 - Acquisition Parameters  
 Date\_ 20150929  
 Time 9.13  
 INSTRUM spect  
 PROBHD 5 mm PABBO BB-  
 PULPROG zg30  
 ID 65536  
 SOLVENT CDCl3  
 NS 64  
 DS 2  
 SWH 8223.685 Hz  
 FIDRES 0.125483 Hz  
 AQ 3.9845387 sec  
 RG 106.96  
 DW 60.800 usec  
 DE 6.50 usec  
 TE 518.1 K  
 D1 1.00000000 sec

----- CHANNEL f1 -----  
 NUC1 1H  
 P1 14.00 usec  
 PLW1 9.7299954 W  
 SFO1 400.1324710 MHz

F2 - Processing parameters  
 SI 65536  
 SF 400.1300114 MHz  
 WDW EM  
 SSB 0  
 LB 0.30 Hz  
 GB 0  
 PC 1.00

SV-275-M

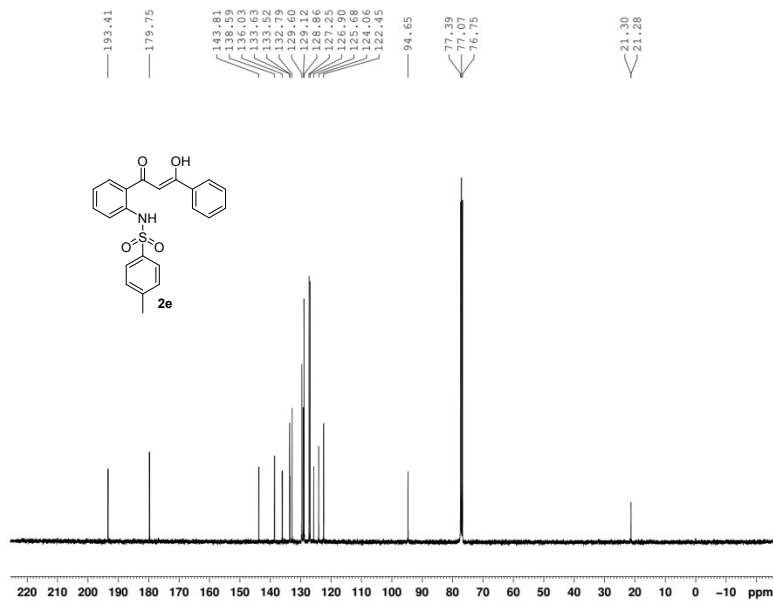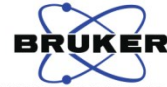

Current Data Parameters  
 NAME 09-29-2015  
 EXPNO 8  
 PROCNO 1

F2 - Acquisition Parameters  
 Date\_ 20150929  
 Time 14.11  
 INSTRUM spect  
 PROBHD 5 mm PABBO BB-  
 PULPROG zgpg30  
 ID 65536  
 SOLVENT CDCl3  
 NS 556  
 DS 4  
 SWH 25252.525 Hz  
 FIDRES 0.385323 Hz  
 AQ 1.2976629 sec  
 RG 198.33  
 DW 19.800 usec  
 DE 6.50 usec  
 TE 518.1 K  
 D1 2.00000000 sec  
 D11 0.03000000 sec

----- CHANNEL f1 -----  
 NUC1 13C  
 P1 9.00 usec  
 PLW1 50.09999847 W  
 SFO1 100.6228293 MHz

----- CHANNEL f2 -----  
 CPDPRG2 waltz16  
 NUC2 1H  
 PCPD2 90.00 usec  
 PLW2 9.36999989 W  
 PLW12 0.22673000 W  
 PLW13 0.18365000 W  
 SFO2 400.1316005 MHz

F2 - Processing parameters  
 SI 32768  
 SF 100.6127690 MHz  
 WDW EM  
 SSB 0  
 LB 1.00 Hz  
 GB 0  
 PC 1.40

SV-208

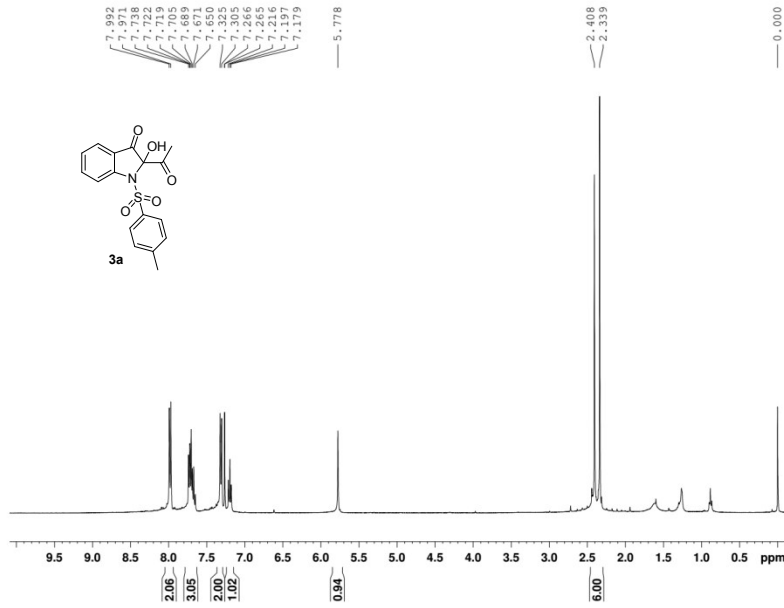

Current Data Parameters  
 NAME 12-02-2014  
 EXPNO 7  
 PROCNO 1

F2 - Acquisition Parameters  
 Date\_ 20141204  
 Time 19.00  
 INSTRUM spect  
 PROBHD 5 mm PABBO BB-  
 PULPROG zg30  
 ID 65536  
 SOLVENT CDCl3  
 NS 32  
 DS 2  
 SWH 8223.685 Hz  
 FIDRES 0.125483 Hz  
 AQ 3.9845387 sec  
 RG 198.33  
 DW 60.800 usec  
 DE 6.50 usec  
 TE 291.7 K  
 D1 1.00000000 sec

----- CHANNEL f1 -----  
 NUC1 1H  
 P1 14.00 usec  
 PLW1 9.7299954 W  
 SFO1 400.1324710 MHz

F2 - Processing parameters  
 SI 65536  
 SF 400.1300082 MHz  
 WDW EM  
 SSB 0  
 LB 0.30 Hz  
 GB 0  
 PC 1.00

SV-208

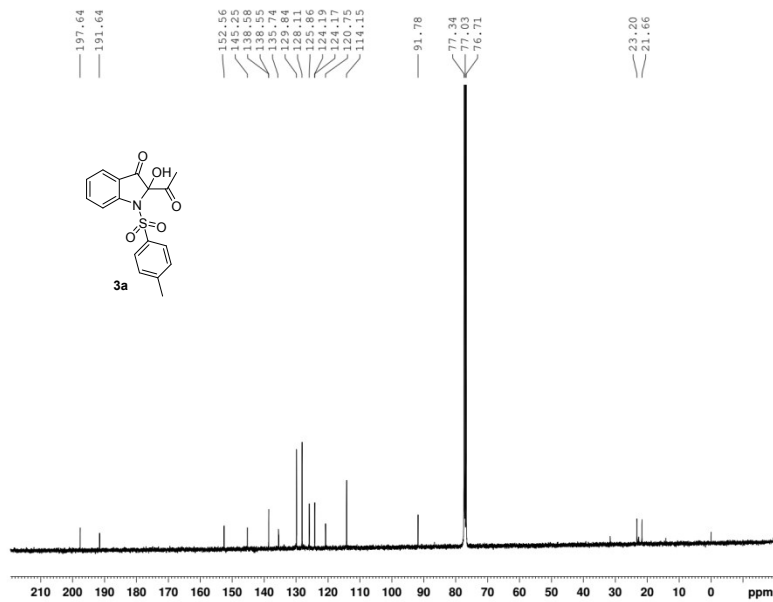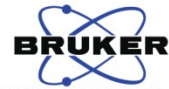

Current Data Parameters  
 NAME 12-02-2014  
 EXPNO 6  
 PROCNO 1

F2 - Acquisition Parameters  
 Date\_ 20141202  
 Time 16.56  
 INSTRUM spect  
 PROBHD 5 mm PABBO BB-  
 PULPROG zgpg30  
 ID 65536  
 SOLVENT CDCl3  
 NS 3540  
 DS 4  
 SWH 24038.461 Hz  
 FIDRES 0.366798 Hz  
 AQ 1.3631988 sec  
 RG 168.03  
 DW 20.800 usec  
 DE 6.50 usec  
 TE 293.5 K  
 D1 2.00000000 sec  
 D11 0.03000000 sec

----- CHANNEL f1 -----  
 NUC1 13C  
 P1 9.00 usec  
 PLW1 50.09999847 W  
 SFO1 100.6228293 MHz

----- CHANNEL f2 -----  
 CPDPRG2 waltz16  
 NUC2 1H  
 PCPD2 90.00 usec  
 PLW2 9.36999989 W  
 PLW12 0.22673000 W  
 PLW13 0.18365000 W  
 SFO2 400.1316005 MHz

F2 - Processing parameters  
 SI 32768  
 SF 100.6127690 MHz  
 WDW EM  
 SSB 0  
 LB 1.00 Hz  
 GB 0  
 PC 1.40



SV-253

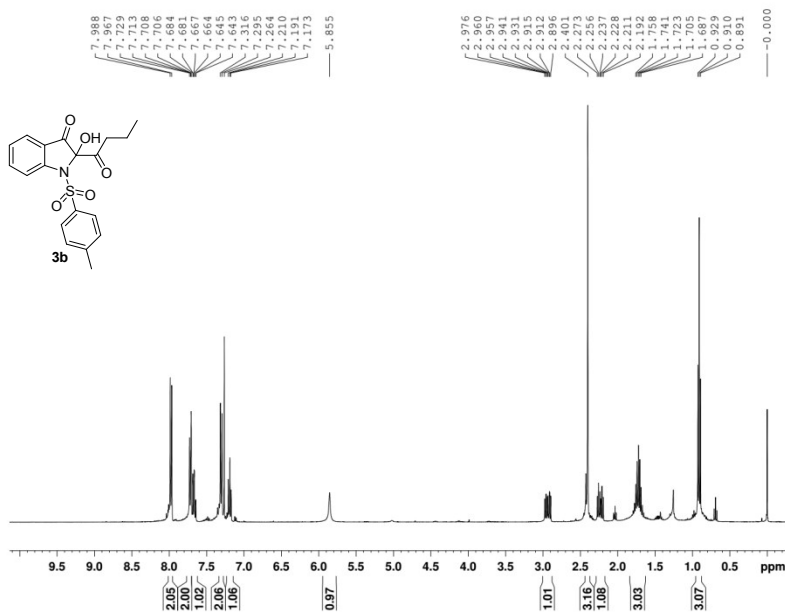

Current Data Parameters  
 NAME 05-19-2015  
 EXPNO 5  
 PROCNO 1

F2 - Acquisition Parameters  
 Date\_ 20150519  
 Time 15.51  
 INSTRUM spect  
 PROBHD 5 mm PABBO BB-  
 PULPROG zg30  
 ID 65536  
 SOLVENT CDCl3  
 NS 64  
 DS 2  
 SWH 8223.685 Hz  
 FIDRES 0.125483 Hz  
 AQ 3.9845387 sec  
 RG 152.51  
 DW 60.800 usec  
 DE 6.50 usec  
 TE 294.9 K  
 D1 1.00000000 sec

----- CHANNEL f1 -----  
 NUC1 1H  
 P1 14.00 usec  
 PLW1 9.7299954 W  
 SF01 400.1324710 MHz

F2 - Processing parameters  
 SI 65536  
 SF 400.1300084 MHz  
 WDW EM  
 SSB 0  
 LB 0.30 Hz  
 GB 0  
 PC 1.00

SV-253

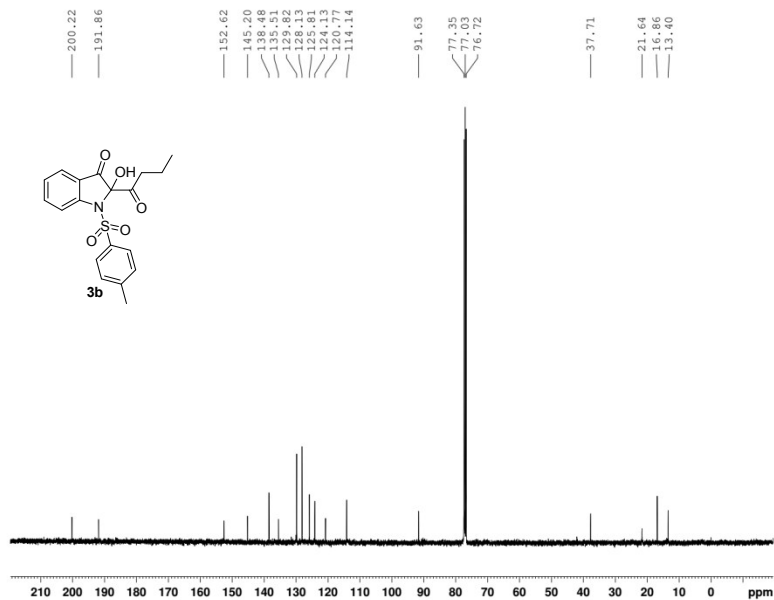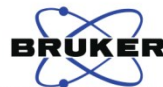

Current Data Parameters  
 NAME 05-19-2015  
 EXPNO 13  
 PROCNO 1

F2 - Acquisition Parameters  
 Date\_ 20150522  
 Time 15.16  
 INSTRUM spect  
 PROBHD 5 mm PABBO BB-  
 PULPROG zgpg30  
 ID 65536  
 SOLVENT CDCl3  
 NS 600  
 DS 4  
 SWH 24038.461 Hz  
 FIDRES 0.366798 Hz  
 AQ 1.3631988 sec  
 RG 198.33  
 DW 20.800 usec  
 DE 6.50 usec  
 TE 296.2 K  
 D1 2.00000000 sec  
 D11 0.03000000 sec

----- CHANNEL f1 -----  
 NUC1 13C  
 P1 9.00 usec  
 PLW1 50.09999847 W  
 SF01 100.6228293 MHz

----- CHANNEL f2 -----  
 CPDPRG2 waltz16  
 NUC2 1H  
 PCPD2 90.00 usec  
 PLW2 9.36999989 W  
 PLW12 0.22673000 W  
 PLW13 0.18365000 W  
 SFO2 400.1316005 MHz

F2 - Processing parameters  
 SI 32768  
 SF 100.6127690 MHz  
 WDW EM  
 SSB 0  
 LB 1.00 Hz  
 GB 0  
 PC 1.40

SV-231

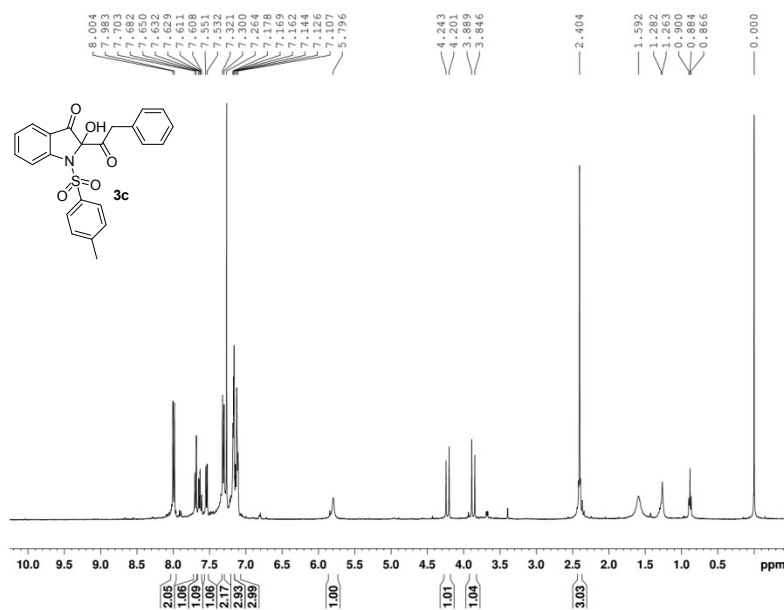

Current Data Parameters  
 NAME 01-16-2015  
 EXPNO 5  
 PROCNO 1

F2 - Acquisition Parameters  
 Date\_ 20150116  
 Time 12.31  
 INSTRUM spect  
 PROBHD 5 mm PABBO BB-  
 PULPROG zg30  
 ID 65536  
 SOLVENT CDCl3  
 NS 52  
 DS 2  
 SWH 8223.685 Hz  
 FIDRES 0.125483 Hz  
 AQ 3.9845387 sec  
 RG 198.33  
 DW 60.800 usec  
 DE 6.50 usec  
 TE 288.3 K  
 D1 1.00000000 sec

----- CHANNEL f1 -----  
 NUC1 1H  
 P1 14.00 usec  
 PLW1 9.7299954 W  
 SFO1 400.1324710 MHz

F2 - Processing parameters  
 SI 65536  
 SF 400.1300083 MHz  
 WDW EM  
 SSB 0  
 LB 0.30 Hz  
 GB 0  
 PC 1.00

SV-231

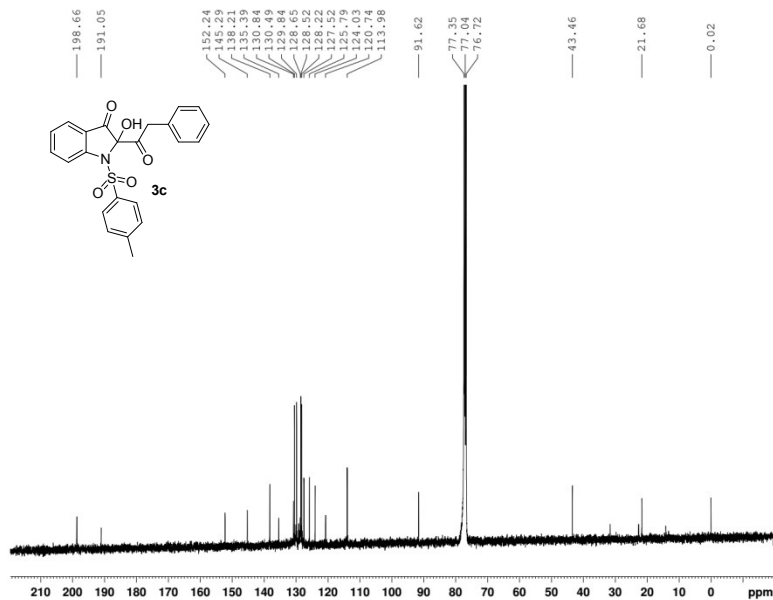

Current Data Parameters  
 NAME 01-16-2015  
 EXPNO 18  
 PROCNO 1

F2 - Acquisition Parameters  
 Date\_ 20150123  
 Time 6.39  
 INSTRUM spect  
 PROBHD 5 mm PABBO BB-  
 PULPROG zg30  
 ID 65536  
 SOLVENT CDCl3  
 NS 12004  
 DS 4  
 SWH 24038.461 Hz  
 FIDRES 0.366798 Hz  
 AQ 1.3531988 sec  
 RG 152.51  
 DW 20.800 usec  
 DE 6.50 usec  
 TE 0 K  
 D1 2.00000000 sec  
 D11 0.03000000 sec

----- CHANNEL f1 -----  
 NUC1 13C  
 P1 9.00 usec  
 PLW1 50.09999847 W  
 SFO1 100.6228293 MHz

----- CHANNEL f2 -----  
 CPDPRG2 waltz16  
 NUC2 1H  
 PCPD2 90.00 usec  
 PLW2 9.36999989 W  
 PLW12 0.22673000 W  
 PLW13 0.18365000 W  
 SFO2 400.1316005 MHz

F2 - Processing parameters  
 SI 32768  
 SF 100.6127690 MHz  
 WDW EM  
 SSB 0  
 LB 1.00 Hz  
 GB 0  
 PC 1.40

SV-275

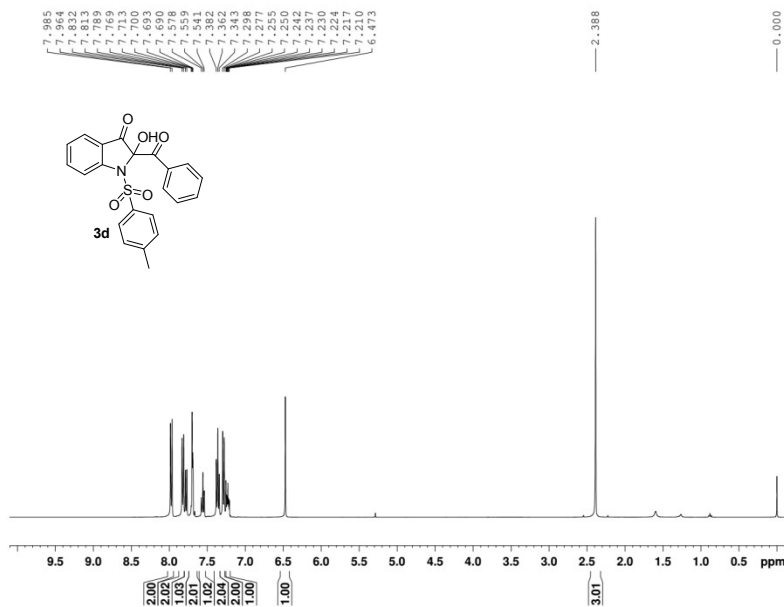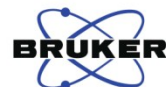

Current Data Parameters  
 NAME 09-24-2015  
 EXPNO 1  
 PROCNO 1

F2 - Acquisition Parameters  
 Date\_ 20150924  
 Time 10:58  
 INSTRUM spect  
 PROBHD 5 mm PABBO BB-  
 PULPROG zg30  
 TD 65536  
 SOLVENT CDCl3  
 NS 36  
 DS 2  
 SWH 8223.685 Hz  
 FIDRES 0.125483 Hz  
 AQ 3.984587 sec  
 RG 138.14  
 DW 60.800 usec  
 DE 6.50 usec  
 TE 0 K  
 D1 1.00000000 sec

----- CHANNEL f1 -----  
 NUC1 1H  
 P1 14.00 usec  
 PLW1 9.72999954 W  
 SFO1 400.1324710 MHz

F2 - Processing parameters  
 SI 65536  
 SF 400.1300122 MHz  
 WDW EM  
 SSB 0  
 LB 0.30 Hz  
 GB 0  
 PC 1.00

SV-275

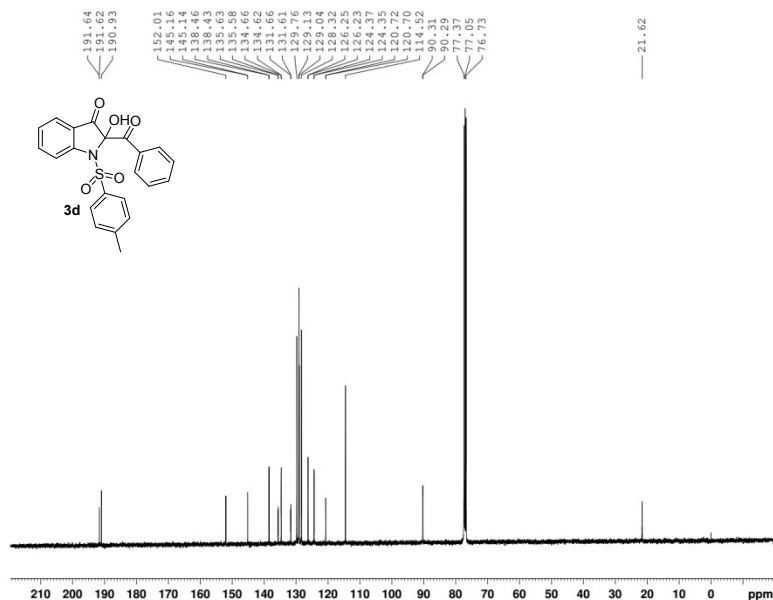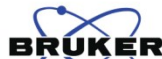

Current Data Parameters  
 NAME 09-24-2015  
 EXPNO 16  
 PROCNO 1

F2 - Acquisition Parameters  
 Date\_ 20150925  
 Time 15:56  
 INSTRUM spect  
 PROBHD 5 mm PABBO BB-  
 PULPROG zgpg30  
 TD 65536  
 SOLVENT CDCl3  
 NS 1360  
 DS 4  
 SWH 24038.461 Hz  
 FIDRES 0.366798 Hz  
 AQ 1.3631988 sec  
 RG 198.33  
 DW 20.800 usec  
 DE 6.50 usec  
 TE 518.1 K  
 D1 2.00000000 sec  
 D11 0.03000000 sec

----- CHANNEL f1 -----  
 NUC1 13C  
 P1 9.00 usec  
 PLW1 50.09999847 W  
 SFO1 100.6228293 MHz

----- CHANNEL f2 -----  
 CPDPRG2 waltz16  
 NUC2 1H  
 PCPD2 90.00 usec  
 PLW2 9.36999989 W  
 PLW12 0.22673000 W  
 PLW13 0.18365000 W  
 SFO2 400.1316005 MHz

F2 - Processing parameters  
 SI 32768  
 SF 100.6127690 MHz  
 WDW EM  
 SSB 0  
 LB 1.00 Hz  
 GB 0  
 PC 1.40

SV-239

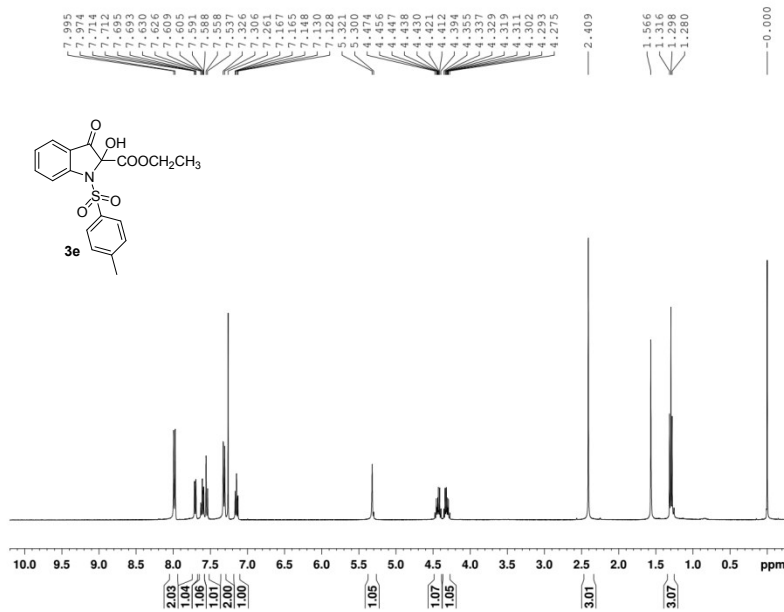

Current Data Parameters  
 NAME 09-16-2015  
 EXPNO 2  
 PROCNO 1

F2 - Acquisition Parameters  
 Date\_ 20150916  
 Time 14.24  
 INSTRUM spect  
 PROBHD 5 mm PABBO BB-  
 PULPROG zg30  
 ID 65536  
 SOLVENT CDCl3  
 NS 32  
 DS 2  
 SWH 8223.685 Hz  
 FIDRES 0.125483 Hz  
 AQ 3.9845387 sec  
 RG 198.33  
 DW 60.800 usec  
 DE 6.50 usec  
 TE 298.0 K  
 D1 1.00000000 sec

----- CHANNEL f1 -----  
 NUC1 1H  
 P1 14.00 usec  
 PLW1 9.7299954 W  
 SF01 400.1324710 MHz

F2 - Processing parameters  
 SI 65536  
 SF 400.1300094 MHz  
 WDW EM  
 SSB 0  
 LB 0.30 Hz  
 GB 0  
 PC 1.00

SV-239

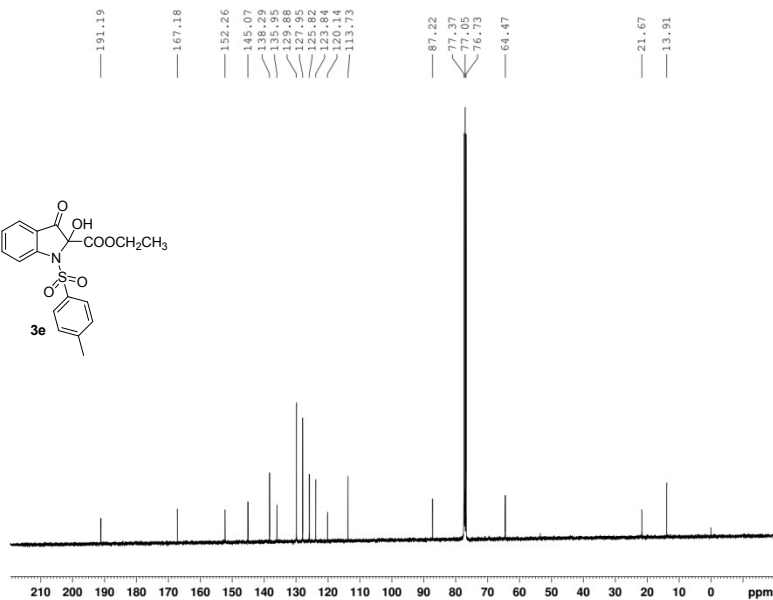

Current Data Parameters  
 NAME 03-17-2015  
 EXPNO 22  
 PROCNO 1

F2 - Acquisition Parameters  
 Date\_ 20150317  
 Time 17.34  
 INSTRUM spect  
 PROBHD 5 mm PABBO BB-  
 PULPROG zgpg30  
 ID 65536  
 SOLVENT CDCl3  
 NS 1404  
 DS 4  
 SWH 24038.461 Hz  
 FIDRES 0.366798 Hz  
 AQ 1.3531988 sec  
 RG 152.51  
 DW 20.800 usec  
 DE 6.50 usec  
 TE 292.5 K  
 D1 2.00000000 sec  
 D11 0.03000000 sec

----- CHANNEL f1 -----  
 NUC1 13C  
 P1 9.00 usec  
 PLW1 50.09999847 W  
 SF01 100.6228293 MHz

----- CHANNEL f2 -----  
 CPDPRG2 waltz16  
 NUC2 1H  
 PCP02 90.00 usec  
 PLW2 9.36999989 W  
 PLW12 0.22673000 W  
 PLW13 0.18365000 W  
 SFO2 400.1316005 MHz

F2 - Processing parameters  
 SI 32768  
 SF 100.6127690 MHz  
 WDW EM  
 SSB 0  
 LB 1.00 Hz  
 GB 0  
 PC 1.40

SV-260

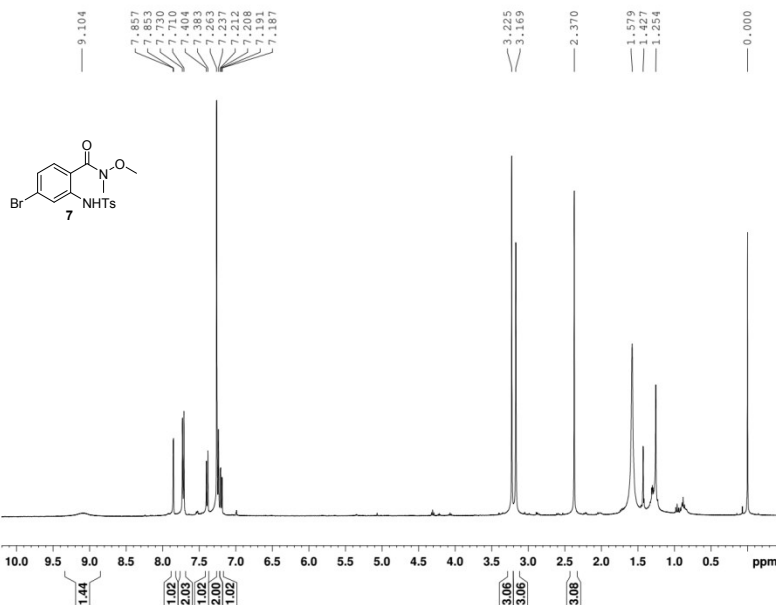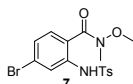

Current Data Parameters  
 NAME 06-05-2015  
 EXPNO 4  
 PROCNO 1

F2 - Acquisition Parameters  
 Date\_ 20150605  
 Time 14.11  
 INSTRUM spect  
 PROBHD 5 mm PABBO BB-  
 PULPROG zg30  
 TD 65536  
 SOLVENT CDCl3  
 NS 128  
 DS 2  
 SWH 8223.685 Hz  
 FIDRES 0.125483 Hz  
 AQ 3.984597 sec  
 RG 198.33  
 DW 60.800 usec  
 DE 6.50 usec  
 TE 297.0 K  
 D1 1.00000000 sec

----- CHANNEL f1 -----  
 NUC1 1H  
 P1 14.00 usec  
 PLW1 9.72999954 W  
 SFO1 400.1324710 MHz

F2 - Processing parameters  
 SI 65536  
 SF 400.1300091 MHz  
 WDW EM  
 SSB 0  
 LB 0.30 Hz  
 GB 0  
 PC 1.00

SV-260

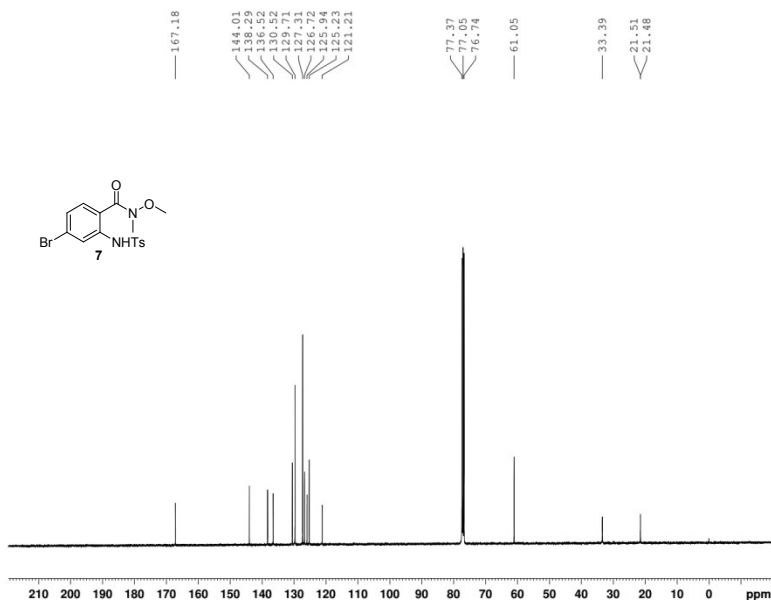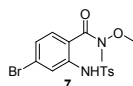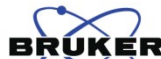

Current Data Parameters  
 NAME 09-24-2015  
 EXPNO 5  
 PROCNO 1

F2 - Acquisition Parameters  
 Date\_ 20150924  
 Time 13.31  
 INSTRUM spect  
 PROBHD 5 mm PABBO BB-  
 PULPROG zgpg30  
 TD 65536  
 SOLVENT CDCl3  
 NS 1988  
 DS 4  
 SWH 24038.461 Hz  
 FIDRES 0.366798 Hz  
 AQ 1.3631988 sec  
 RG 198.33  
 DW 20.800 usec  
 DE 6.50 usec  
 TE 0 K  
 D1 2.00000000 sec  
 D11 0.03000000 sec

----- CHANNEL f1 -----  
 NUC1 13C  
 P1 9.00 usec  
 PLW1 50.09999847 W  
 SFO1 100.6228293 MHz

----- CHANNEL f2 -----  
 CPDPRG2 waltz16  
 NUC2 1H  
 PCPD2 90.00 usec  
 PLW2 9.36999989 W  
 PLW12 0.22673000 W  
 PLW13 0.18365000 W  
 SFO2 400.1316005 MHz

F2 - Processing parameters  
 SI 32768  
 SF 100.6127690 MHz  
 WDW EM  
 SSB 0  
 LB 1.00 Hz  
 GB 0  
 PC 1.40

SV-320

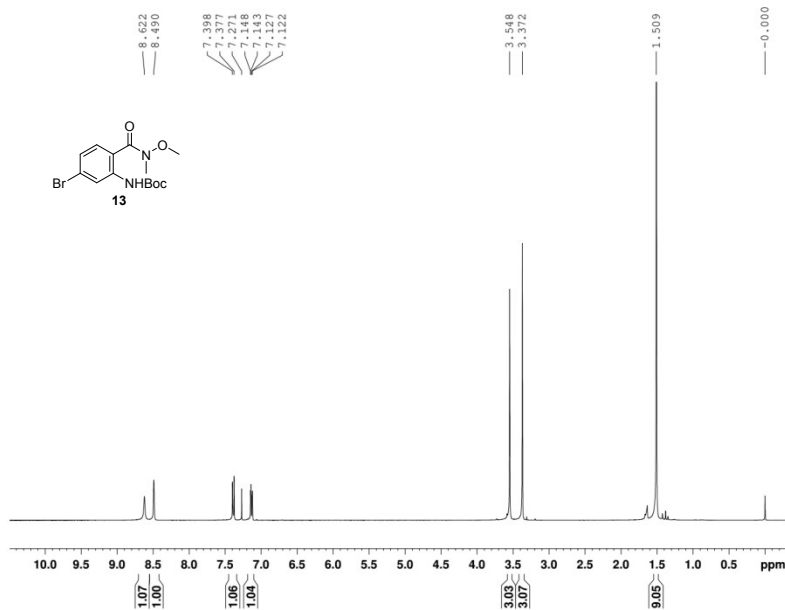

Current Data Parameters  
 NAME 03-24-2016  
 EXPNO 3  
 PROCNO 1

F2 - Acquisition Parameters  
 Date\_ 20160324  
 Time 17.18  
 INSTRUM spect  
 PROBHD 5 mm PABBO BB-  
 PULPROG zg30  
 ID 65536  
 SOLVENT CDCl3  
 NS 16  
 DS 2  
 SWH 8223.685 Hz  
 FIDRES 0.125483 Hz  
 AQ 3.9845387 sec  
 RG 124.55  
 DW 60.800 usec  
 DE 6.50 usec  
 TE 291.7 K  
 D1 1.00000000 sec

----- CHANNEL f1 -----  
 NUC1 1H  
 P1 14.00 usec  
 PLW1 9.7299954 W  
 SFO1 400.1324710 MHz

F2 - Processing parameters  
 SI 65536  
 SF 400.130059 MHz  
 WDW EM  
 SSB 0  
 LB 0.30 Hz  
 GB 0  
 PC 1.00

SV-320

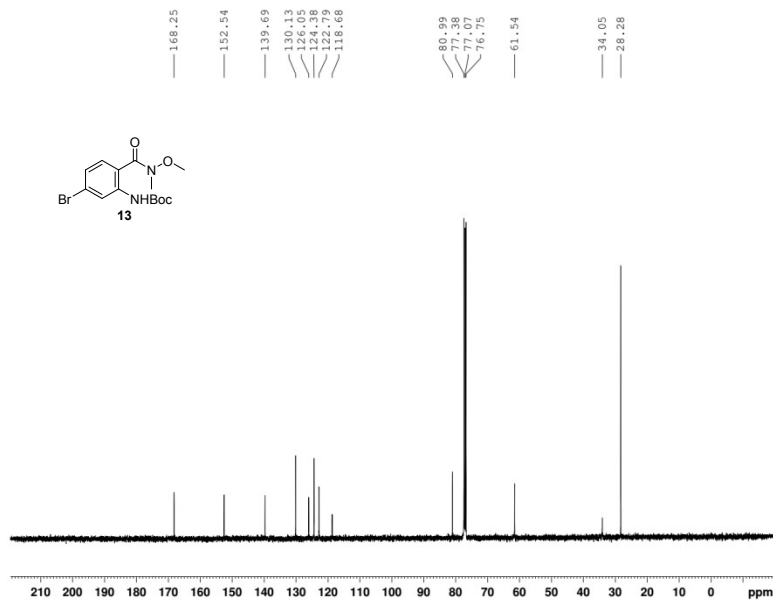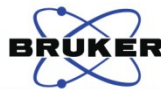

Current Data Parameters  
 NAME 03-24-2016  
 EXPNO 12  
 PROCNO 1

F2 - Acquisition Parameters  
 Date\_ 20160326  
 Time 11.50  
 INSTRUM spect  
 PROBHD 5 mm PABBO BB-  
 PULPROG zgpg30  
 ID 65536  
 SOLVENT CDCl3  
 NS 256  
 DS 4  
 SWH 24038.461 Hz  
 FIDRES 0.366798 Hz  
 AQ 1.3531988 sec  
 RG 168.03  
 DW 20.800 usec  
 DE 6.50 usec  
 TE 290.9 K  
 D1 2.00000000 sec  
 D11 0.03000000 sec

----- CHANNEL f1 -----  
 NUC1 13C  
 P1 9.00 usec  
 PLW1 50.09999847 W  
 SFO1 100.6228293 MHz

----- CHANNEL f2 -----  
 CPDPRG2 waltz16  
 NUC2 1H  
 PCPD2 90.00 usec  
 PLW2 9.36999899 W  
 PLW12 0.22673000 W  
 PLW13 0.18365000 W  
 SFO2 400.1316005 MHz

F2 - Processing parameters  
 SI 32768  
 SF 100.6127690 MHz  
 WDW EM  
 SSB 0  
 LB 1.00 Hz  
 GB 0  
 PC 1.40

SV-328

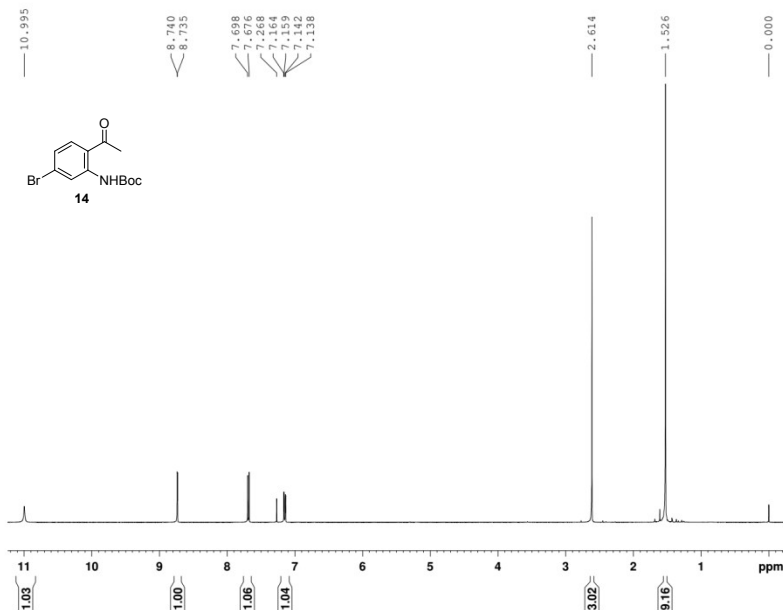

Current Data Parameters  
 NAME 05-03-2016  
 EXPNO 5  
 PROCNO 1

F2 - Acquisition Parameters  
 Date\_ 20160503  
 Time 13.01  
 INSTRUM spect  
 PROBHD 5 mm PABBO BB-  
 PULPROG zg30  
 TD 65536  
 SOLVENT CDCl3  
 NS 13  
 DS 2  
 SWH 8223.685 Hz  
 FIDRES 0.125483 Hz  
 AQ 3.9845387 sec  
 RG 124.55  
 DW 60.800 usec  
 DE 6.50 usec  
 TE 297.6 K  
 D1 1.00000000 sec

----- CHANNEL f1 -----  
 NUC1 1H  
 P1 14.00 usec  
 PLW1 9.7299954 W  
 SFO1 400.1324710 MHz

F2 - Processing parameters  
 SI 65536  
 SF 400.1300069 MHz  
 WDW EM  
 SSB 0  
 LB 0.30 Hz  
 GB 0  
 PC 1.00

SV-328

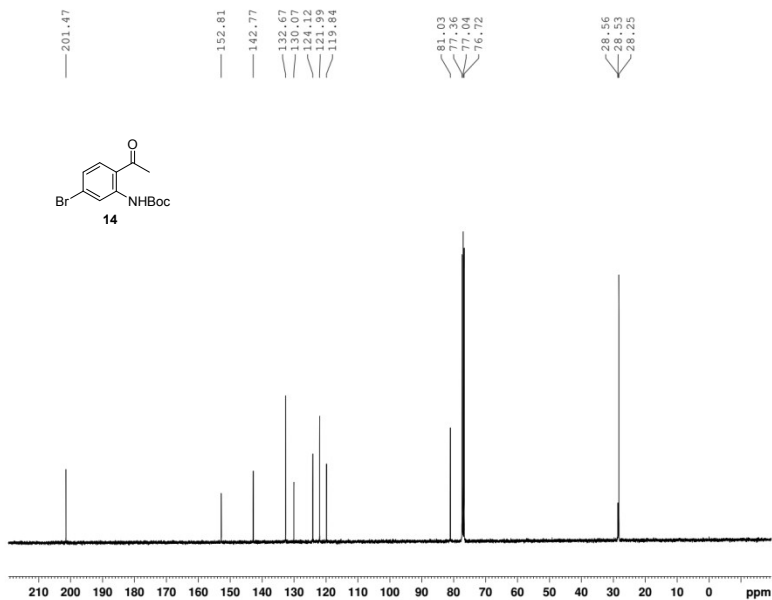

Current Data Parameters  
 NAME 05-03-2016  
 EXPNO 10  
 PROCNO 1

F2 - Acquisition Parameters  
 Date\_ 20160504  
 Time 14.49  
 INSTRUM spect  
 PROBHD 5 mm PABBO BB-  
 PULPROG zgpg30  
 TD 65536  
 SOLVENT CDCl3  
 NS 700  
 DS 4  
 SWH 24038.461 Hz  
 FIDRES 0.366798 Hz  
 AQ 1.3631988 sec  
 RG 198.33  
 DW 20.800 usec  
 DE 6.50 usec  
 TE 297.1 K  
 D1 2.00000000 sec  
 D11 0.03000000 sec

----- CHANNEL f1 -----  
 NUC1 13C  
 P1 9.00 usec  
 PLW1 50.09999847 W  
 SFO1 100.6228293 MHz

----- CHANNEL f2 -----  
 CPDPRG2 waltz16  
 NUC2 1H  
 PCP2 90.00 usec  
 PLW2 9.36999989 W  
 PLW12 0.22673000 W  
 PLW13 0.18365000 W  
 SFO2 400.1316005 MHz

F2 - Processing parameters  
 SI 32768  
 SF 100.6127690 MHz  
 WDW EM  
 SSB 0  
 LB 1.00 Hz  
 GB 0  
 PC 1.40

SV-261

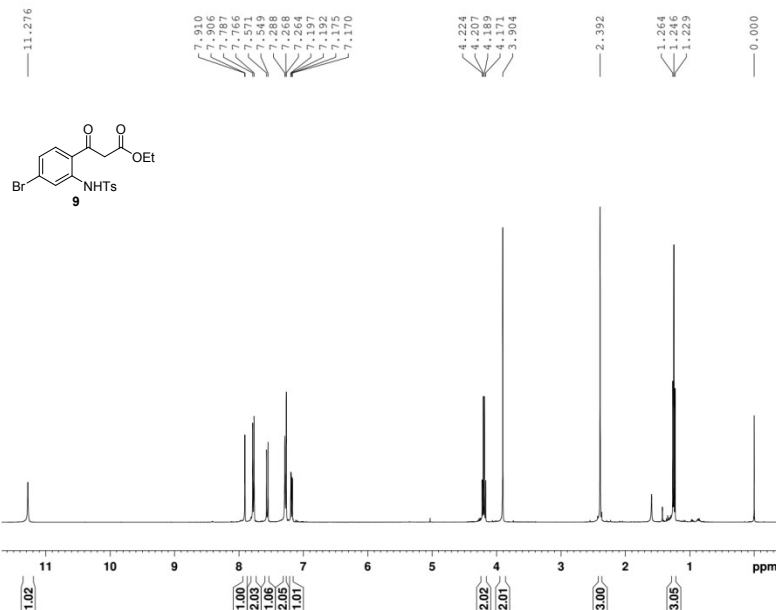

Current Data Parameters  
 NAME 06-11-2015  
 EXPNO 4  
 PROCNO 1

F2 - Acquisition Parameters  
 Date\_ 20150611  
 Time 11.22  
 INSTRUM spect  
 PROBHD 5 mm PABBO BB-  
 PULPROG zg30  
 ID 65536  
 SOLVENT CDCl3  
 NS 58  
 DS 2  
 SWH 8223.685 Hz  
 FIDRES 0.125483 Hz  
 AQ 3.9845387 sec  
 RG 168.03  
 DW 60.800 usec  
 DE 6.50 usec  
 TE 295.9 K  
 D1 1.00000000 sec

----- CHANNEL f1 -----  
 NUC1 1H  
 P1 14.00 usec  
 PLW1 9.7299954 W  
 SFO1 400.1324710 MHz

F2 - Processing parameters  
 SI 65536  
 SF 400.1300085 MHz  
 WDW EM  
 SSB 0  
 LB 0.30 Hz  
 GB 0  
 PC 1.00

SV-261

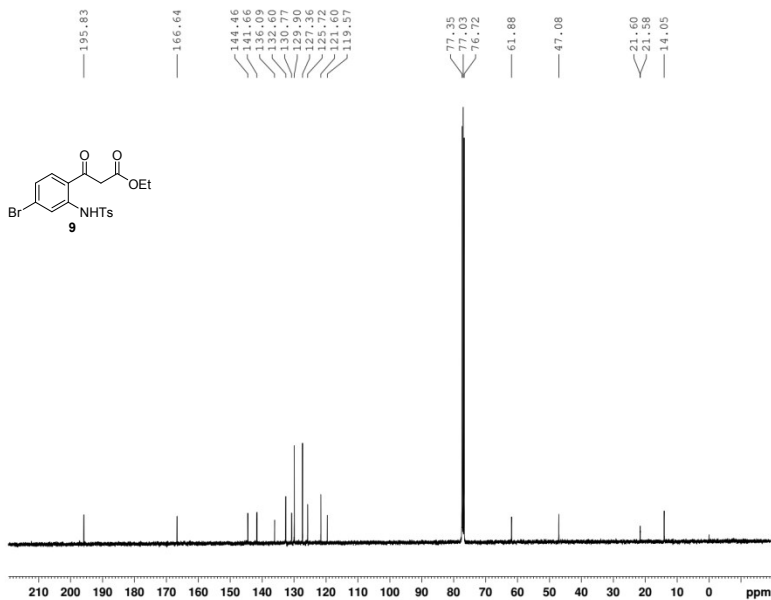

Current Data Parameters  
 NAME 06-11-2015  
 EXPNO 10  
 PROCNO 1

F2 - Acquisition Parameters  
 Date\_ 20150611  
 Time 16.40  
 INSTRUM spect  
 PROBHD 5 mm PABBO BB-  
 PULPROG zgpg30  
 ID 65536  
 SOLVENT CDCl3  
 NS 1024  
 DS 4  
 SWH 24038.461 Hz  
 FIDRES 0.366798 Hz  
 AQ 1.3531988 sec  
 RG 198.33  
 DW 20.800 usec  
 DE 6.50 usec  
 TE 296.8 K  
 D1 2.00000000 sec  
 D11 0.03000000 sec

----- CHANNEL f1 -----  
 NUC1 13C  
 P1 9.00 usec  
 PLW1 50.09999847 W  
 SFO1 100.6228293 MHz

----- CHANNEL f2 -----  
 CPDPRG2 waltz16  
 NUC2 1H  
 PCPD2 90.00 usec  
 PLW2 9.36999989 W  
 PLW12 0.22673000 W  
 PLW13 0.18365000 W  
 SFO2 400.1316005 MHz

F2 - Processing parameters  
 SI 32768  
 SF 100.6127690 MHz  
 WDW EM  
 SSB 0  
 LB 1.00 Hz  
 GB 0  
 PC 1.40



SV-312

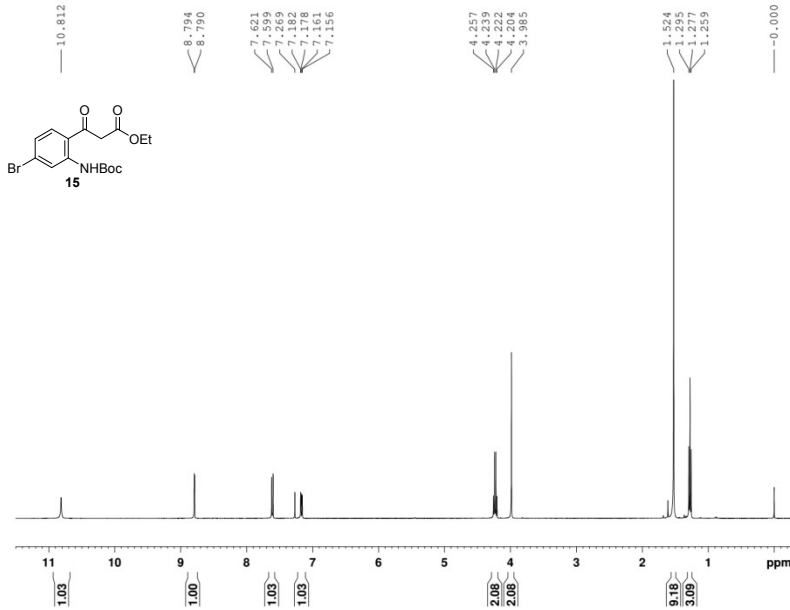

Current Data Parameters  
 NAME 03-05-2016  
 EXPNO 22  
 PROCNO 1

F2 - Acquisition Parameters  
 Date\_ 20160305  
 Time 13.08  
 INSTRUM spect  
 PROBHD 5 mm PABBO BB-  
 PULPROG zg30  
 ID 65536  
 SOLVENT CDCl3  
 NS 16  
 DS 2  
 SWH 8223.685 Hz  
 FIDRES 0.125483 Hz  
 AQ 3.9845387 sec  
 RG 124.55  
 DW 60.800 usec  
 DE 6.50 usec  
 TE 293.6 K  
 D1 1.00000000 sec

----- CHANNEL f1 -----  
 NUC1 1H  
 P1 14.00 usec  
 PLW1 9.7299954 W  
 SFO1 400.1324710 MHz

F2 - Processing parameters  
 SI 65536  
 SF 400.1300062 MHz  
 WDW EM  
 SSB 0  
 LB 0.30 Hz  
 GB 0  
 PC 1.00

SV-312

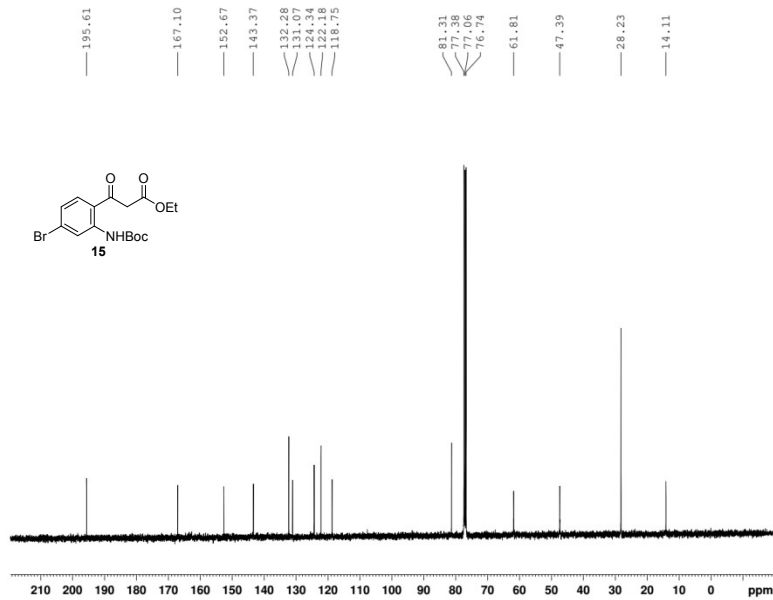

Current Data Parameters  
 NAME 03-05-2016  
 EXPNO 31  
 PROCNO 1

F2 - Acquisition Parameters  
 Date\_ 20160308  
 Time 9.50  
 INSTRUM spect  
 PROBHD 5 mm PABBO BB-  
 PULPROG zg30  
 ID 65536  
 SOLVENT CDCl3  
 NS 280  
 DS 4  
 SWH 24038.461 Hz  
 FIDRES 0.366798 Hz  
 AQ 1.3531988 sec  
 RG 198.33  
 DW 20.800 usec  
 DE 6.50 usec  
 TE 291.5 K  
 D1 2.00000000 sec  
 D11 0.03000000 sec

----- CHANNEL f1 -----  
 NUC1 13C  
 P1 9.00 usec  
 PLW1 50.09999847 W  
 SFO1 100.6228293 MHz

----- CHANNEL f2 -----  
 CPDPRG2 waltz16  
 NUC2 1H  
 PCPD2 90.00 usec  
 PLW2 9.36999989 W  
 PLW12 0.22673000 W  
 PLW13 0.18365000 W  
 SFO2 400.1316005 MHz

F2 - Processing parameters  
 SI 32768  
 SF 100.6127690 MHz  
 WDW EM  
 SSB 0  
 LB 1.00 Hz  
 GB 0  
 PC 1.40

SV-262

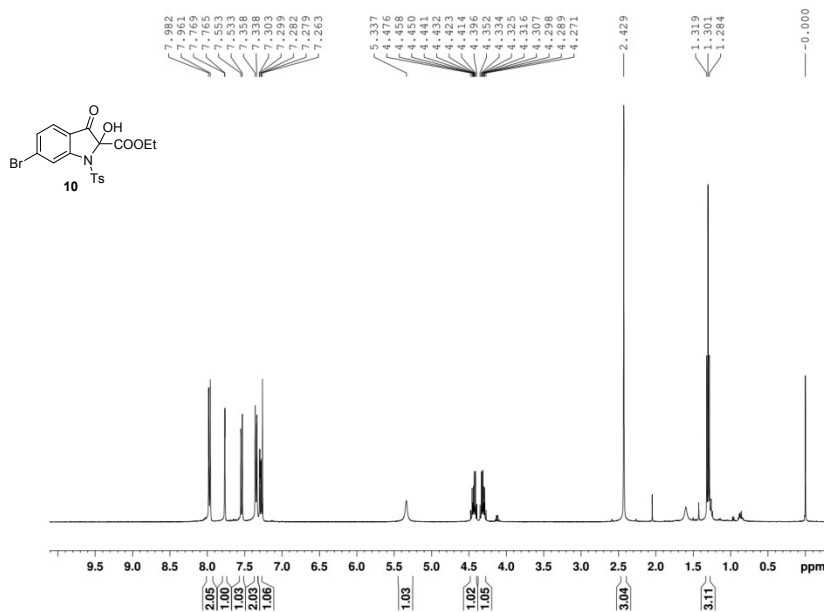

Current Data Parameters  
 NAME 06-11-2015  
 EXPNO 5  
 PROCNO 1

F2 - Acquisition Parameters  
 Date\_ 20150611  
 Time 11.28  
 INSTRUM spect  
 PROBHD 5 mm PABBO BB-  
 PULPROG zg30  
 ID 65536  
 SOLVENT CDCl3  
 NS 72  
 DS 2  
 SWH 8223.685 Hz  
 FIDRES 0.125483 Hz  
 AQ 3.9845387 sec  
 RG 198.33  
 DW 60.800 usec  
 DE 6.50 usec  
 TE 295.9 K  
 D1 1.00000000 sec

----- CHANNEL f1 -----  
 NUC1 1H  
 P1 14.00 usec  
 PLW1 9.7299954 W  
 SFO1 400.1324710 MHz

F2 - Processing parameters  
 SI 65536  
 SF 400.1300093 MHz  
 WDW EM  
 SSB 0  
 LB 0.30 Hz  
 GB 0  
 PC 1.00

SV-262

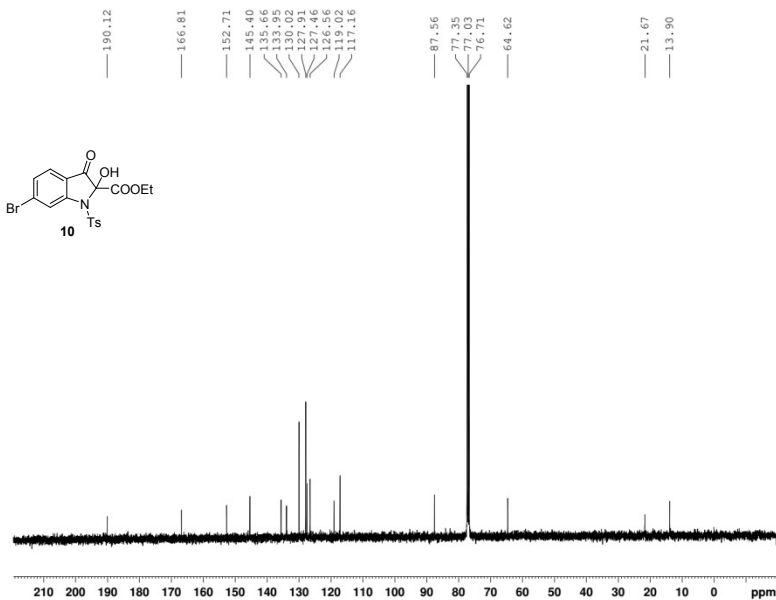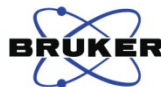

Current Data Parameters  
 NAME 06-11-2015  
 EXPNO 11  
 PROCNO 1

F2 - Acquisition Parameters  
 Date\_ 20150612  
 Time 9.53  
 INSTRUM spect  
 PROBHD 5 mm PABBO BB-  
 PULPROG zgpg30  
 ID 65536  
 SOLVENT CDCl3  
 NS 500  
 DS 4  
 SWH 24038.461 Hz  
 FIDRES 0.366798 Hz  
 AQ 1.3531988 sec  
 RG 168.03  
 DW 20.800 usec  
 DE 6.50 usec  
 TE 296.2 K  
 D1 2.00000000 sec  
 D11 0.03000000 sec

----- CHANNEL f1 -----  
 NUC1 13C  
 P1 9.00 usec  
 PLW1 50.09999847 W  
 SFO1 100.6228293 MHz

----- CHANNEL f2 -----  
 CPDPRG2 waltz16  
 NUC2 1H  
 PCPD2 90.00 usec  
 PLW2 9.36999989 W  
 PLW12 0.22673000 W  
 PLW13 0.18365000 W  
 SFO2 400.1316005 MHz

F2 - Processing parameters  
 SI 32768  
 SF 100.6127690 MHz  
 WDW EM  
 SSB 0  
 LB 1.00 Hz  
 GB 0  
 PC 1.40

SV-327-2

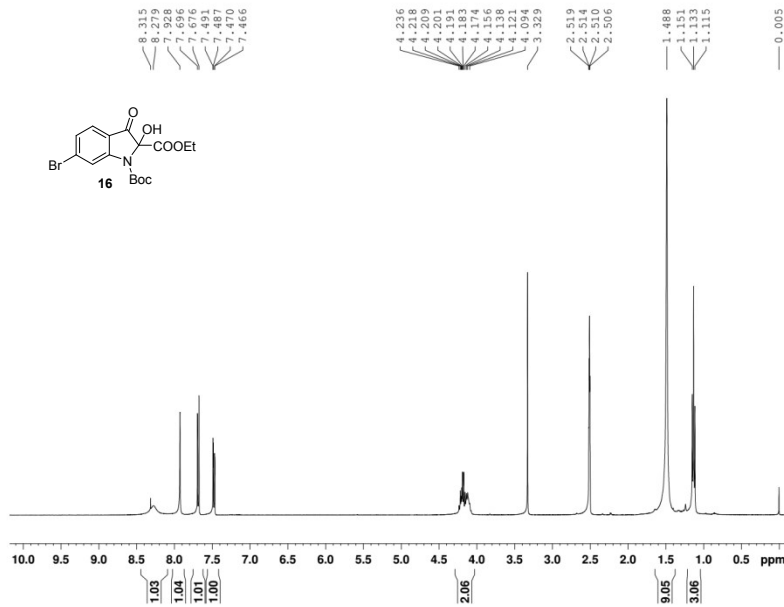

Current Data Parameters  
 NAME 05-03-2016  
 EXPNO 10  
 PROCNO 1

F2 - Acquisition Parameters  
 Date\_ 20160503  
 Time 13.37  
 INSTRUM spect  
 PROBHD 5 mm PABBO BB-  
 PULPROG zg30  
 ID 65536  
 SOLVENT DMSO  
 NS 20  
 DS 2  
 SWH 8223.685 Hz  
 FIDRES 0.125483 Hz  
 AQ 3.9845387 sec  
 RG 168.03  
 DW 60.800 usec  
 DE 6.50 usec  
 TE 297.7 K  
 D1 1.00000000 sec

----- CHANNEL f1 -----  
 NUC1 1H  
 P1 14.00 usec  
 PLW1 9.7299954 W  
 SFO1 400.1324710 MHz

F2 - Processing parameters  
 SI 65536  
 SF 400.1300000 MHz  
 WDW EM  
 SSB 0  
 LB 0.30 Hz  
 GB 0  
 PC 1.00

SV-327-2

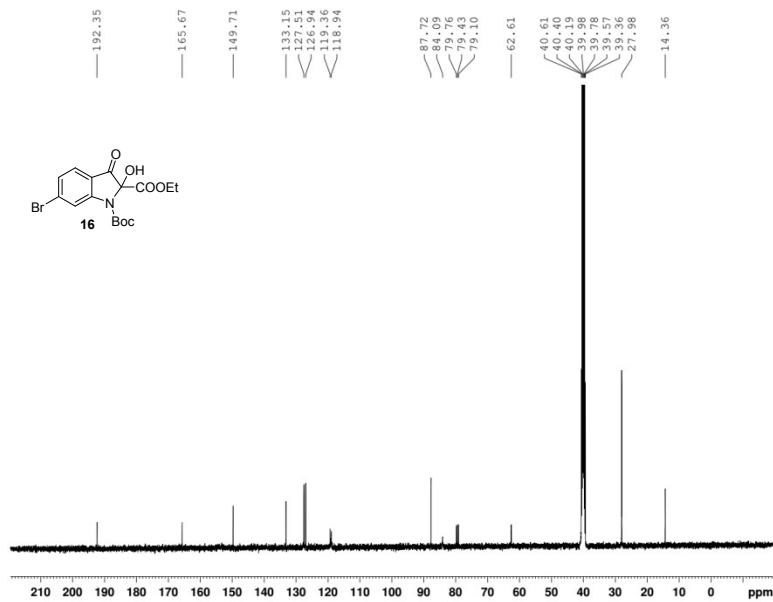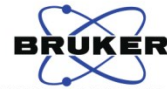

Current Data Parameters  
 NAME 05-03-2016  
 EXPNO 12  
 PROCNO 1

F2 - Acquisition Parameters  
 Date\_ 20160504  
 Time 16.03  
 INSTRUM spect  
 PROBHD 5 mm PABBO BB-  
 PULPROG zgpg30  
 ID 65536  
 SOLVENT DMSO  
 NS 1184  
 DS 4  
 SWH 24038.461 Hz  
 FIDRES 0.366798 Hz  
 AQ 1.3631988 sec  
 RG 198.33  
 DW 20.800 usec  
 DE 6.50 usec  
 TE 296.2 K  
 D1 2.00000000 sec  
 D11 0.03000000 sec

----- CHANNEL f1 -----  
 NUC1 13C  
 P1 9.00 usec  
 PLW1 50.09999847 W  
 SFO1 100.6228293 MHz

----- CHANNEL f2 -----  
 CPDPRG2 waltz16  
 NUC2 1H  
 PCPD2 90.00 usec  
 PLW2 9.36999989 W  
 PLW12 0.22673000 W  
 PLW13 0.18365000 W  
 SFO2 400.1316005 MHz

F2 - Processing parameters  
 SI 32768  
 SF 100.6127690 MHz  
 WDW EM  
 SSB 0  
 LB 1.00 Hz  
 GB 0  
 PC 1.40

SV-281

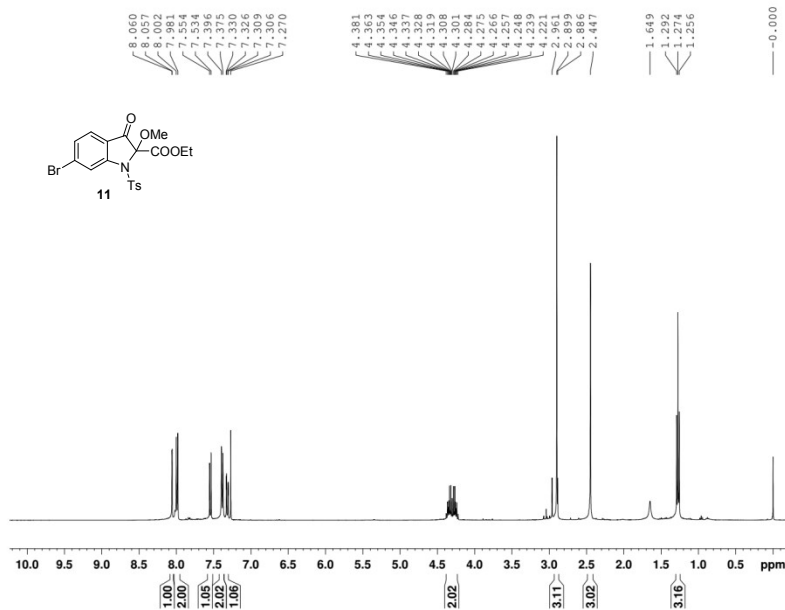

Current Data Parameters  
 NAME 10-09-2015  
 EXPNO 4  
 PROCNO 1

F2 - Acquisition Parameters  
 Date\_ 20151010  
 Time 11.24  
 INSTRUM spect  
 PROBHD 5 mm PABBO BB-  
 PULPROG zg30  
 ID 65536  
 SOLVENT CDCl3  
 NS 68  
 DS 2  
 SWH 8223.685 Hz  
 FIDRES 0.125483 Hz  
 AQ 3.9845387 sec  
 RG 152.51  
 DW 60.800 usec  
 DE 6.50 usec  
 TE 296.6 K  
 D1 1.00000000 sec

----- CHANNEL f1 -----  
 NUC1 1H  
 P1 14.00 usec  
 PLW1 9.7299954 W  
 SF01 400.1324710 MHz

F2 - Processing parameters  
 SI 65536  
 SF 400.1300060 MHz  
 WDW EM  
 SSB 0  
 LB 0.30 Hz  
 GB 0  
 PC 1.00

SV-281

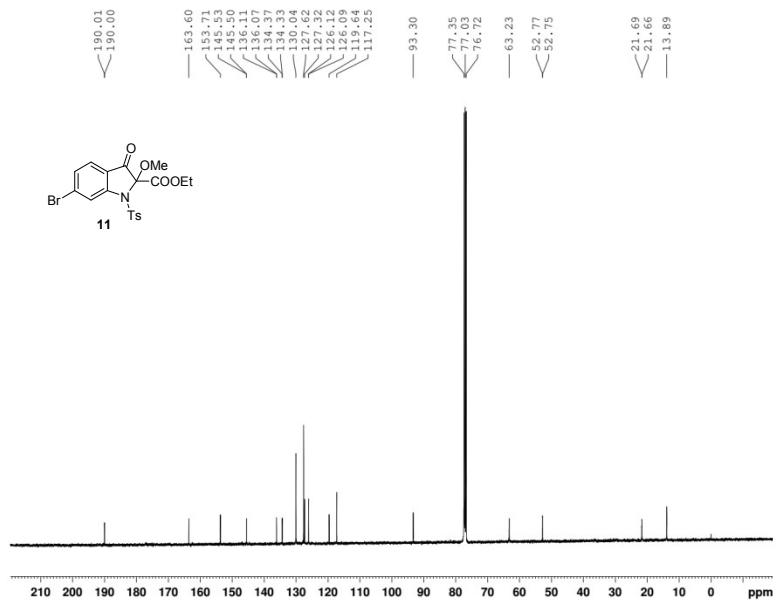

Current Data Parameters  
 NAME 10-09-2015  
 EXPNO 15  
 PROCNO 1

F2 - Acquisition Parameters  
 Date\_ 20151019  
 Time 21.18  
 INSTRUM spect  
 PROBHD 5 mm PABBO BB-  
 PULPROG zg30  
 ID 65536  
 SOLVENT CDCl3  
 NS 3600  
 DS 4  
 SWH 24038.461 Hz  
 FIDRES 0.366798 Hz  
 AQ 1.3531988 sec  
 RG 198.33  
 DW 20.800 usec  
 DE 6.50 usec  
 TE 297.6 K  
 D1 2.00000000 sec  
 D11 0.03000000 sec

----- CHANNEL f1 -----  
 NUC1 13C  
 P1 9.00 usec  
 PLW1 50.09999847 W  
 SF01 100.6228293 MHz

----- CHANNEL f2 -----  
 CPDPRG2 waltz16  
 NUC2 1H  
 PCPD2 90.00 usec  
 PLW2 9.36999989 W  
 PLW12 0.22673000 W  
 PLW13 0.18365000 W  
 SFO2 400.1316005 MHz

F2 - Processing parameters  
 SI 32768  
 SF 100.6127690 MHz  
 WDW EM  
 SSB 0  
 LB 1.00 Hz  
 GB 0  
 PC 1.40

SV-314

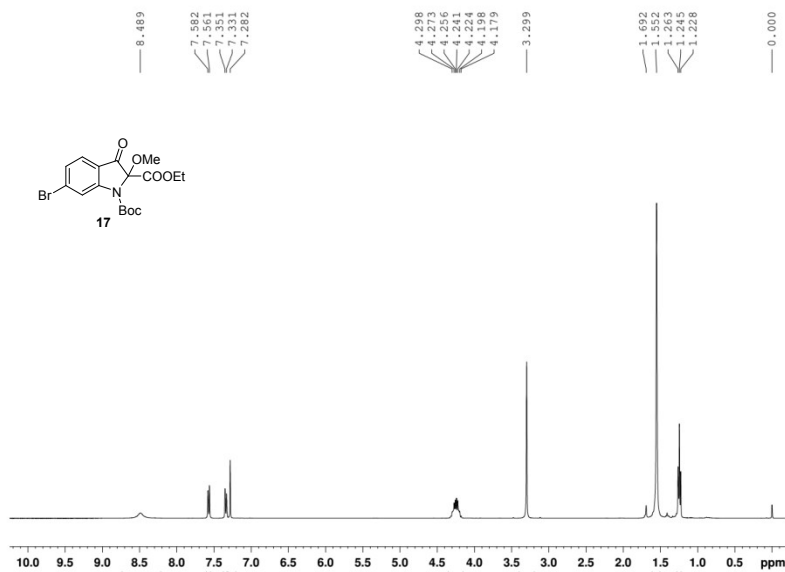

Current Data Parameters  
 NAME 03-12-2016  
 EXPNO 6  
 PROCNO 1

F2 - Acquisition Parameters  
 Date\_ 20160312  
 Time 13.21  
 INSTRUM spect  
 PROBHD 5 mm PABBO BB-  
 PULPROG zg30  
 ID 65536  
 SOLVENT CDCl3  
 NS 32  
 DS 2  
 SWH 8223.685 Hz  
 FIDRES 0.125483 Hz  
 AQ 3.9845387 sec  
 RG 94.96  
 DW 60.800 usec  
 DE 6.50 usec  
 TE 290.3 K  
 D1 1.00000000 sec

----- CHANNEL f1 -----  
 NUC1 1H  
 P1 14.00 usec  
 PLW1 9.7299954 W  
 SFO1 400.1324710 MHz

F2 - Processing parameters  
 SI 65536  
 SF 400.1300017 MHz  
 WDW EM  
 SSB 0  
 LB 0.30 Hz  
 GB 0  
 PC 1.00

SV-314

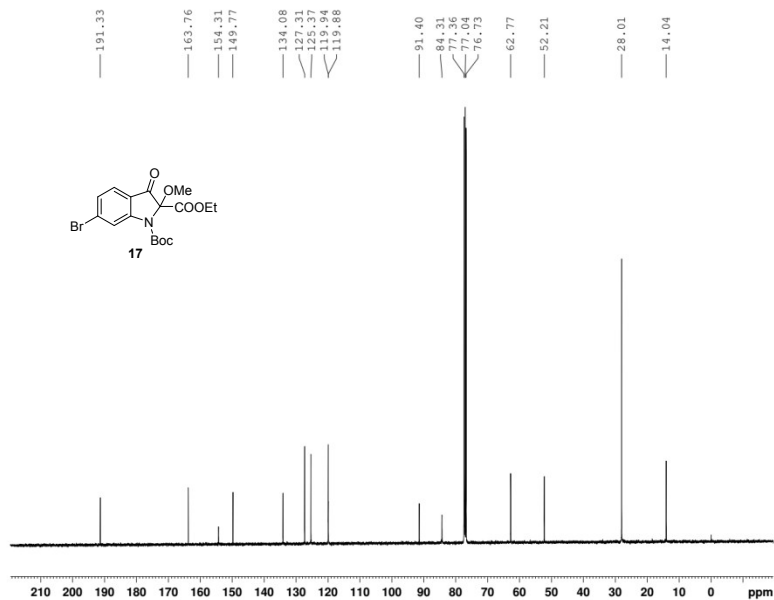

Current Data Parameters  
 NAME 03-12-2016  
 EXPNO 10  
 PROCNO 1

F2 - Acquisition Parameters  
 Date\_ 20160314  
 Time 14.47  
 INSTRUM spect  
 PROBHD 5 mm PABBO BB-  
 PULPROG zgpg30  
 ID 65536  
 SOLVENT CDCl3  
 NS 1296  
 DS 4  
 SWH 24038.461 Hz  
 FIDRES 0.366798 Hz  
 AQ 1.3531988 sec  
 RG 198.33  
 DW 20.800 usec  
 DE 6.50 usec  
 TE 297.9 K  
 D1 2.00000000 sec  
 D11 0.03000000 sec

----- CHANNEL f1 -----  
 NUC1 13C  
 P1 9.00 usec  
 PLW1 50.09999847 W  
 SFO1 100.6228293 MHz

----- CHANNEL f2 -----  
 CPDPRG2 waltz16  
 NUC2 1H  
 PCPD2 90.00 usec  
 PLW2 9.36999989 W  
 PLW12 0.22673000 W  
 PLW13 0.18365000 W  
 SFO2 400.1316005 MHz

F2 - Processing parameters  
 SI 32768  
 SF 100.6127690 MHz  
 WDW EM  
 SSB 0  
 LB 1.00 Hz  
 GB 0  
 PC 1.40

SV-318

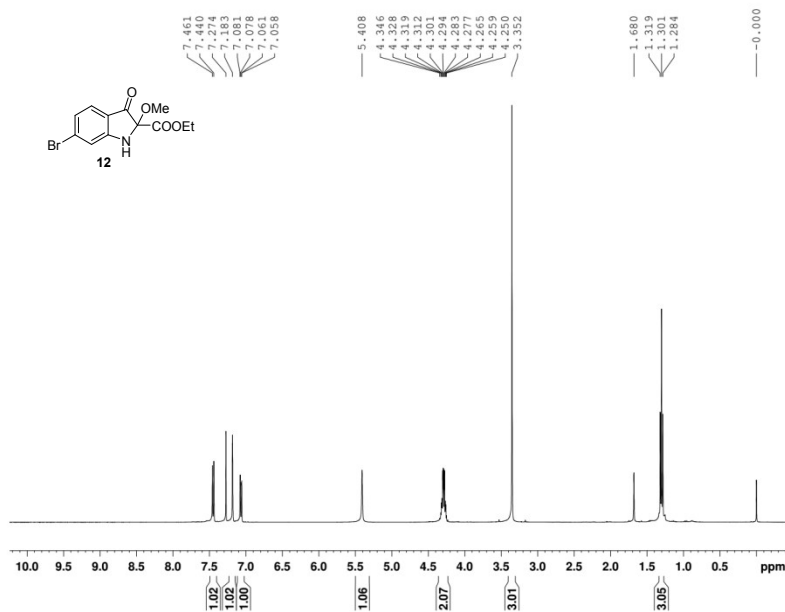

Current Data Parameters  
 NAME 03-17-2016  
 EXPNO 6  
 PROCNO 1

F2 - Acquisition Parameters  
 Date\_ 20160317  
 Time 13.52  
 INSTRUM spect  
 PROBHD 5 mm PABBO BB-  
 PULPROG zg30  
 ID 65536  
 SOLVENT CDCl3  
 NS 32  
 DS 2  
 SWH 8223.685 Hz  
 FIDRES 0.125483 Hz  
 AQ 3.9845387 sec  
 RG 138.14  
 DW 60.800 usec  
 DE 6.50 usec  
 TE 291.1 K  
 D1 1.00000000 sec

----- CHANNEL f1 -----  
 NUC1 1H  
 P1 14.00 usec  
 PLW1 9.7299954 W  
 SFO1 400.1324710 MHz

F2 - Processing parameters  
 SI 65536  
 SF 400.1300042 MHz  
 WDW EM  
 SSB 0  
 LB 0.30 Hz  
 GB 0  
 PC 1.00

SV-318

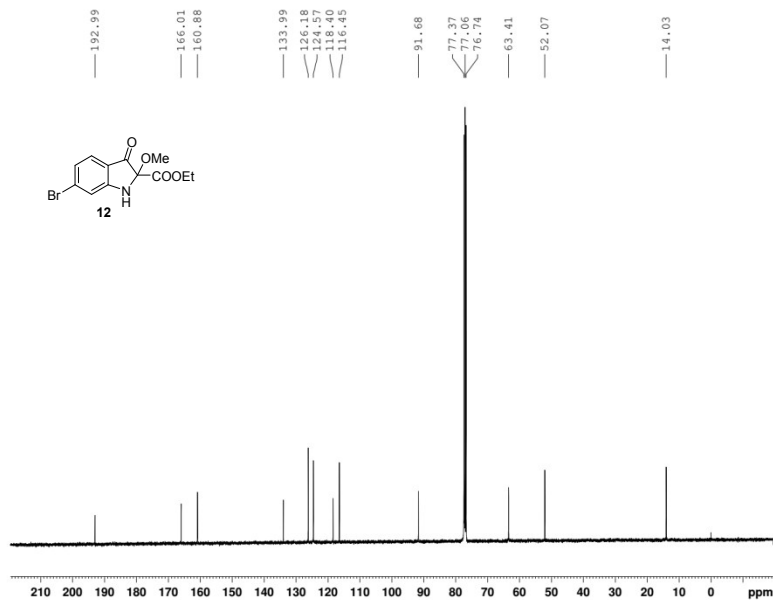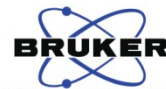

Current Data Parameters  
 NAME 03-17-2016  
 EXPNO 23  
 PROCNO 1

F2 - Acquisition Parameters  
 Date\_ 20160321  
 Time 12.12  
 INSTRUM spect  
 PROBHD 5 mm PABBO BB-  
 PULPROG zgpg30  
 ID 65536  
 SOLVENT CDCl3  
 NS 1628  
 DS 4  
 SWH 24038.461 Hz  
 FIDRES 0.366798 Hz  
 AQ 1.3531988 sec  
 RG 198.33  
 DW 20.800 usec  
 DE 6.50 usec  
 TE 293.4 K  
 D1 2.00000000 sec  
 D11 0.03000000 sec

----- CHANNEL f1 -----  
 NUC1 13C  
 P1 9.00 usec  
 PLW1 50.09999847 W  
 SFO1 100.6228293 MHz

----- CHANNEL f2 -----  
 CPDPRG2 waltz16  
 NUC2 1H  
 PCPD2 90.00 usec  
 PLW2 9.36999989 W  
 PLW12 0.22673000 W  
 PLW13 0.18365000 W  
 SFO2 400.1316005 MHz

F2 - Processing parameters  
 SI 32768  
 SF 100.6127690 MHz  
 WDW EM  
 SSB 0  
 LB 1.00 Hz  
 GB 0  
 PC 1.40
